# Supplementary material for: SOX2 Is an Oncogene Activated by Recurrent 3q26.3 Amplifications in Human Lung Squamous Cell Carcinomas
Source: PLoS One. 2010 Jan 29;5(1):e8960. doi: 10.1371/journal.pone.0008960 (PMC2813300; doi:10.1371/journal.pone.0008960)
Supplement: Genelist S1 — Supplementary genelists xls file, several sheets. (0.42 MB XLS) [file pone.0008960.s011.xls]

## Sheet: SOX2 squamous signature
Gene Symbol	Log2 ratio BEAS-2B SOX2 / Control
40787	0.721767
ABAT	-0.698261
ABCA1	0.877791
ABCA8	0.855257
ABLIM3	-1.48929
ACAD11 /// NPHP3	-0.742121
ACOX3	0.645521
ACSL1	-0.630593
ACSL5	-0.77047
ACTG2	0.634284
ACVR2A	1.12395
ACY1	-0.655892
ADAM19	0.662972
ADAMTS3	-1.05978
ADAMTSL3	0.785859
ADCY1	-0.690386
AHR	-0.741575
AHSA2	-0.678436
AIM1	-0.827514
AK3L1 /// AK3L2	-1.1453
AKAP5	0.825314
AKIRIN2	0.915111
AKR1C2	0.63345
AKR1C3	1.12552
ALDH1A2	-0.647901
ALDH6A1	0.623409
ALDH7A1	-0.606468
AMACR /// C1QTNF3	0.643961
AMPD3	-0.706705
ANKH	0.769802
ANKRD29	-0.94907
ANKRD30B	0.744387
ANKS6	0.590602
ANPEP	-1.18792
ANTXR2	-0.842606
ANXA10	1.16328
AOF1	0.784417
AOX1	-0.680908
AP1M2	0.642569
APOL6	-0.62226
APOOL	0.59173
AQP1	-1.06986
ARAF	0.619805
ARHGEF7	0.635319
ARMCX4	0.822495
ARMETL1 /// GPER /// NFRKB	0.766585
ARSB	0.865083
ARX	-0.763656
ASAM	-0.994725
ASNS	0.688247
ASXL2	0.842154
ATL3	0.695589
ATP11A	0.608848
ATP11B	0.587754
ATP5S	0.653422
AVEN	0.896459
AZGP1 /// AZGP1P1	-0.59807
BAG1	0.704322
BCAT1	0.630217
BCL2L13	0.776889
BDKRB1	-1.12411
BDNF	-0.657957
BEX4	-0.90743
BGN	0.875638
BHLHB2	0.687178
BIC	-2.05599
BIN1	0.615469
BIRC3	-1.2528
BMP1	0.71543
BMP5	-0.865959
BMP8A /// BMP8B	0.733019
BMPER	-0.692624
BMPR2	0.651275
BNC2	0.653941
BNIP3	-0.967342
BST2	-2.89646
BTBD11	-0.864659
BTBD9	-0.65518
BTG3	-0.634673
BTN2A2	-0.814067
BTRC	0.678419
C10orf33	-0.681889
C10orf75	1.21524
C10orf81	-0.696849
C11orf70	-0.746554
C13orf1	0.653267
C13orf31	-0.600491
C14orf145	-0.688547
C15orf48	-3.6697
C15orf59	-0.824626
C17orf51	0.591342
C18orf54	0.881829
C19orf20	0.600224
C19orf66	-0.59616
C1orf128	0.799561
C1orf213	-0.687846
C1orf43	0.710376
C1orf58	0.607939
C1orf59	0.748578
C1orf69	0.747616
C1orf96	0.919763
C1orf97	0.897311
C1RL	-0.631596
C1S	-0.762671
C2 /// CFB	-1.36659
C20orf94	-0.602244
C22orf32	0.778227
C2orf27	0.641222
C2orf76	0.619701
C3	-2.11617
C3orf27	0.584599
C3orf30	-0.692375
C3orf31	-0.592453
C5	0.58549
C5orf13	0.696406
C5orf41	0.677286
C5orf42	0.639892
C5orf44	0.815654
C6orf105	0.670311
C6orf164	-0.597603
C6orf182 /// C6orf182P	0.840329
C6orf26 /// MSH5	-0.618841
C6orf57	-0.591587
C6orf89	0.587828
C7orf57	0.906249
C8orf42	-1.08591
C9orf125	-0.590588
CADM3	-0.728562
CADPS2	-0.821308
CALB2	-0.670981
CALD1	0.601278
CAMK2D	0.789678
CARD11	-0.751359
CASP1	-0.919773
CASP1 /// COP1	-0.895955
CASP4	-0.692144
CBLB	0.686712
CBX5	0.846065
CBX6 /// NPTXR	0.663127
CCDC117	0.651379
CCDC123	0.599991
CCDC147	0.799643
CCDC3	-0.608157
CCDC69	-1.34033
CCDC8	-0.934937
CCDC88C	-0.767213
CCL20	-3.06837
CCL5	-0.655084
CCNL1	0.649712
CD109	-0.697524
CD200	-1.23409
CD24	-0.927668
CD27	0.585852
CD40	-0.584515
CD47	-0.604634
CD55	-0.598711
CD59	0.734846
CD7	-0.652248
CDCP1	-0.890198
CDGAP	0.839501
CDH10	0.600075
CDKL2	-0.939029
CDO1	0.676357
CDX4	-0.624676
CDYL2	-0.592249
CEL	0.626972
CENTG3	0.611893
CFI	-0.886667
CFLAR	0.740766
CG012	0.693177
CGN	0.597028
CGNL1	0.982107
CHST11	-0.823538
CLDN1	-0.693135
CLDN7	-0.779597
CLMN	-1.36497
CLN8	0.619414
CLTB	-0.585356
CLTCL1	0.616171
CLU	-1.12194
CMBL	0.940394
CMPK2	-1.59268
CMTM1	0.65594
COG3	0.617743
COL12A1	-0.998095
COL13A1	-0.780916
COL15A1	-0.746556
COL1A1	1.17562
COL27A1	0.650068
COL3A1	1.32539
COL6A1	0.759769
COL6A3	0.623347
COL8A1	-0.757926
COX11	0.651
CPA3	0.868488
CPE	-1.02637
CPEB4	0.651311
CPT1C	-0.696682
CRH	-0.596946
CRLS1	0.620075
CRYAB	2.13369
CRYBA4	-0.638994
CSF2	-0.936104
CTDSPL2	0.676421
CTGF	0.850183
CTSO	-0.822871
CTSS	-0.722025
CXADR	-1.25499
CXADRP1	-0.77471
CXCL1	-2.64457
CXCL2	-2.28917
CXCL3	-2.09041
CXCL5	-0.76589
CXCL6	-1.08066
CXorf52 /// LOC100132967	0.595602
CYP2E1	-0.595558
CYP39A1	-0.625092
CYP51A1	0.774195
CYTH3	1.00886
DACT1	0.656411
DCP2	0.627273
DDO	-0.621298
DDX52	0.634915
DDX58	-0.834212
DDX60	-0.862125
DHCR7	0.67717
DHRS2	1.08376
DHX35	0.657018
DIRAS3	1.29499
DKFZp434H1419	0.605976
DKFZp547H025	0.841252
DLEU2	-0.592226
DMC1	0.934026
DNAH5	-0.5903
DNAJA4	1.13893
DNAJB5	0.954614
DNAJC12	0.854789
DNER	-0.805197
DOCK1	0.959805
DOCK5	0.793577
DOCK9	0.662844
DPP4	-1.0508
DPYSL3	0.690969
DST	1.12446
DUSP10	0.859001
DUSP4	-0.604324
DUSP9	-0.60572
ECM2	0.865482
EDIL3	-1.1285
EDN1	1.34775
EFHC2	-1.04368
EFNA5	-0.943291
EFNB2	0.757461
EGF	0.708003
EGR3	0.679306
ELAVL2	1.11969
ELF3	-0.915047
ELFN1	0.818643
ELOVL2	-0.643913
ELOVL5	0.587133
ELOVL6	0.657878
ELOVL7	-0.982581
ENDOGL1	0.726198
ENO2	-0.641771
ENPP2	-0.733361
ENTPD2	-0.675643
ENTPD6	0.717313
EPB41L4B	-0.604075
EPDR1	0.619099
ERAP2	-0.755136
ERBB2	0.835509
ERBB4	-0.642871
ERMP1	-0.840729
EVI1	0.74997
EVI2B	-0.625375
EWSR1	1.15795
F2R	-0.616172
F2RL1	0.591225
F3	-0.893148
FAM101B	0.745762
FAM122A	0.688796
FAM129A	-1.53492
FAM13A1	-0.754114
FAM13C1	0.77713
FAM154A	-0.749567
FAM175A	0.673168
FAM38B	-0.722025
FAM46A	-0.867031
FAM59B	-0.586408
FAM62B	0.656567
FAM65B	0.685219
FAM80B	0.76645
FANCC	0.716751
FAR2	-1.32202
FAT3	0.882527
FBN2	0.614001
FBXO32	0.941247
FCF1	0.699312
FER	0.758986
FER1L4	-0.97029
FEZ1	-1.19225
FGF18	-0.692685
FGF5	0.726287
FGFBP1	0.879248
FGFBP3	0.735442
FHL1	-1.02104
FLJ14186 /// LOC100128460 /// LOC100133177 /// LOC349114 /// LOC399744 /// LOC441124 /// LOC729021 /// LOC729660 /// LOC730235 /// tcag7.907	-0.614644
FLJ14213	0.750693
FLJ25076	-0.629755
FLJ32810	0.83415
FLJ40296 /// LOC729233 /// LOC729240 /// LOC729246 /// LOC729250	-0.67428
FLJ41747	1.03587
FLJ43663	-0.593635
FLJ44896	0.59544
FLRT2	0.715618
FN1	1.12297
FOSL1	-0.605427
FOXG1	0.6038
FOXK1	-0.91633
FOXN3	0.612828
FOXO1	0.971212
FRAT1	0.699361
FREQ	0.625468
FRMD4A	-1.02311
FRY	0.64577
FUCA1	-0.766654
FYN	-0.619701
FZD1	0.593886
FZD7	-0.587365
G0S2	-1.4986
GABARAPL3	-0.672899
GABBR1 /// UBD	1.29292
GAD1	-0.675558
GALNT1	0.884636
GALNT12	-0.61608
GALNT14	0.607363
GALNT5	1.00428
GAS1	-0.991716
GATA3	0.690438
GATA6	-0.658121
GBP1	-0.769006
GBP2	-0.928865
GCA	-0.758009
GCNT2	-0.817845
GDF5	0.64668
GGTLC1	-0.598922
GLIPR1	0.665751
GLIPR2	0.657892
GLRB	1.07297
GLS	0.585764
GMPR	-0.711467
GNA13	0.602026
GNAL	-0.680363
GOLGA8A	-0.914119
GOLGA8A /// GOLGA8B	-0.714557
GPC2	-0.682417
GPC4	3.22587
GPD2	0.724395
GPLD1	-0.607268
GPR158	-0.664358
GPR39	0.957413
GPR64	1.89843
GPR68	-0.708378
GRAMD1C	-0.974339
GREM1	1.00026
GRIPAP1	-0.717436
GSTM4	0.708401
GSTO2	-0.653964
GSTT1	0.893283
GTDC1	0.748074
GTPBP1	-0.941382
GTPBP6	0.61074
GUSBL2	-0.65381
hCG_1645220	0.727047
hCG_20857 /// RP11-544M22.4	-0.993377
HDAC2	-0.604162
HEATR5A	0.75451
HECTD2	0.721236
HERC5	-1.41398
HERC6	-0.886217
HES1	1.57091
HHAT	0.787413
HIC1	0.699435
HIPK3	0.83559
HIST1H2AG /// HIST1H2AH /// HIST1H2AI /// HIST1H2AJ /// HIST1H2AK /// HIST1H2AL /// HIST1H2AM	1.02713
HIST1H2BC /// HIST1H2BE /// HIST1H2BF /// HIST1H2BG /// HIST1H2BI	0.694201
HK2	-0.825683
HLA-DOA	-0.750737
HLA-DPA1	-0.664405
HLF	-0.645254
HMGCS1	0.68867
HOOK2	0.707544
HOOK3	0.60019
HOXB7	0.808691
HOXC4 /// HOXC6	0.703844
HOXC9	0.703662
HYAL3 /// NAT6	0.645595
HYMAI	0.614986
ICAM1	-0.805072
ICAM5	-0.683105
ID4	0.725497
IDS	0.655559
IFI27	-5.03592
IFI44	-2.13823
IFI44L	-3.60014
IFI6	-1.77564
IFIH1	-0.8604
IFIT1	-1.16673
IFIT2	-0.766063
IFIT3	-0.868176
IFITM1	-1.55442
IFITM2	-0.586698
IGFBP5	0.824094
IGHD	-0.668884
IKZF4	0.694354
IL15RA	-0.625475
IL1B	-0.659946
IL1R1	1.36672
IL28RA	0.757003
IL6	-0.888358
IL8	-2.4244
ING3	0.685891
ING5 /// LOC727773	0.706464
INHBA	0.835112
INO80C	0.833416
INO80D	0.63929
INPP5F	0.771431
INSIG1	0.653499
INTS4	0.787022
IQCA1	0.743808
IRF7	-0.623491
ISG15	-0.872538
ISG20	-1.14272
ITGA4	0.707763
ITGA6	-0.76249
ITGB1	0.621877
ITGB8	1.17485
ITGBL1	0.713443
ITPKB	0.687282
JAG1	1.5648
JPH3	-0.650064
JSRP1	-0.590201
KCND3	-0.645108
KCNE1	0.755631
KCNMA1	-0.863132
KCNQ1	0.591954
KCTD12	0.738864
KHSRP	0.721332
KIAA0241	-0.807718
KIAA0746	0.591127
KIAA0746 /// SERINC2	0.768654
KIAA1609	-0.613151
KIFC2	-0.641982
KIR3DL1	-0.644828
KLF2	-0.592771
KLF4	-0.818498
KLHL29	-0.670747
KLHL31	-0.814403
KLRC1 /// KLRC2	-1.24186
KPTN	0.594741
KRT17	0.807558
KRTAP10-12	-0.613077
KRTAP1-3	-0.611398
L3MBTL	-0.673229
L3MBTL2	0.62451
LAMA3	-0.620932
LAMB3	-0.616326
LANCL2	0.655527
LBH	1.44131
LEPR	0.597626
LEPREL1	-0.585119
LIPH	-0.755921
LMO7	0.739003
LOC100049716	0.584515
LOC100128405	-0.919853
LOC100128718	-1.28997
LOC100129762 /// PRUNE2	0.635619
LOC100129965 /// PRDM11	0.708828
LOC100130389	-0.65164
LOC100130829 /// ZFX /// ZFY	1.02628
LOC100131419	-0.797654
LOC100131928	0.588141
LOC100132161 /// LOC100132167 /// LOC100132678 /// LOC643630	0.621609
LOC100132301	-0.640335
LOC100132815	0.709315
LOC100132881 /// LOC728715 /// OVOS /// OVOS2	-0.664041
LOC100133609 /// MARCH3	-0.733024
LOC100133946 /// MTCP1	0.867277
LOC129293	-0.846012
LOC148189	0.676621
LOC151877	0.628579
LOC157931	-0.626889
LOC202451	-0.653797
LOC220930	-0.649574
LOC283070	-0.762262
LOC283403	-0.623361
LOC283535	0.656188
LOC283588	0.62319
LOC284408	0.773739
LOC284801	0.735261
LOC284952	0.607196
LOC285628	-1.67956
LOC285827	0.663797
LOC338758	0.68275
LOC339290	0.742689
LOC339352	0.608593
LOC375010	-0.767605
LOC388796 /// SNORA71B	-0.6569
LOC389023	0.64577
LOC401577	0.60281
LOC440288	0.639033
LOC440993	-0.628952
LOC440995	-0.771535
LOC441108	-0.637098
LOC441383 /// ZNF252	0.585267
LOC442497 /// SLC3A2	0.674515
LOC541469	0.621539
LOC572558	-0.708068
LOC606495	0.809904
LOC643623	0.757
LOC643837	0.691999
LOC647109	0.584793
LOC652526 /// PDE4DIP	0.61794
LOC728198 /// TAF9B	0.652593
LOC728613	0.600504
LOC729397	-0.596761
LOC730098	0.588224
LOC91948	-0.61149
LOX	-0.925727
LPAR1	-0.59763
LPCAT4	-0.811698
LRRC15	0.706298
LRRC2	1.21269
LRRC34	0.600768
LRRC41	-0.605193
LRRC7	-0.747383
LRRFIP1	-0.622012
LSS	0.798233
LY6G5C	0.690163
LY75	-1.68823
LY96	0.670119
LYPD1	1.41929
LYPD6	-0.665059
MAGEH1	0.899089
MALAT1	-0.807157
MAML2	0.667148
MAN1A1	-0.625375
MAN1A2	0.705404
MANEAL	0.654805
MAP1LC3A	0.61892
MAP2K2	-0.609805
MAP3K2	-0.617032
MAP3K7IP3	0.877951
MAP9	0.63251
MARK3	-0.870973
MAST4	-0.685314
MBNL2	0.655693
MCPH1	0.66798
MCTP2	-0.728861
MDFIC	0.710009
MEGF6	0.978024
MERTK	0.705447
MET	-0.662148
METTL3	-0.61135
MEX3B	0.73376
MFAP5	5.27576
MFI2	-0.728829
MGC12982	0.627273
MGC5370	0.610279
MGLL	-0.758303
MGST1	-0.94389
MIER3	0.90197
MITF	-0.642655
MLF1	-0.628983
MLL	0.688491
MMAB	0.753202
MME	1.41563
MPP7	-0.856281
MPPE1	-0.784017
MRPL30	0.672691
MRVI1	0.612351
MTMR1	0.884173
MVK	0.594263
MX1	-2.43913
MX2	-2.5002
MXD1	0.746326
MYCL1	0.662896
MYO5B	-0.716861
N6AMT1	0.634375
NAMPT	-0.647195
NAPSB	-0.732484
NARG1L	0.594979
NAV3	-0.598897
NBEA	-1.22243
NCAM1	-0.984678
NDRG1	-0.695525
NDUFA2	0.655751
NEDD4L	-0.735043
NEDD9	0.626054
NEGR1	0.769098
NEK3	-0.736744
NEO1	-0.719516
NES	1.57254
NF2	0.649247
NFATC4	-0.905056
NFE2L3	-0.70596
NFKBIZ	-0.772187
NFYC	0.612754
NHLRC2	0.802765
NHLRC3	0.739689
NID2	0.619748
NIT1	-0.625077
NKX2-5	0.771904
NKX3-1	-0.624748
NMNAT2	0.623435
NOD2	-0.626301
NOVA1	-1.16551
NOXO1	-0.659255
N-PAC	0.641907
NPHP4	-0.609592
NR2F1	1.54881
NR3C2	-1.15069
NRG1	1.0831
NRXN3	-0.618476
NSUN4	0.756478
NTRK2	-0.675756
NUCKS1	0.598419
NUDT12	0.809127
NUDT16P	-0.937408
NUP210	-0.772768
OAS1	-2.16457
OAS2	-1.56461
OAS3	-1.07203
ODF2L	-0.841945
ODZ3	0.681006
OGFRL1	-0.652878
OPN5	0.783377
OR2L1P	-0.738567
OSR2	0.604388
P4HA1	-0.596985
PAG1	-1.2321
PAPPA	-0.766646
PARP14	-0.711076
PBLD	0.723249
PBRM1	0.755641
PBX1	-1.05874
PCLO	1.97477
PCTK3	-0.812868
PCYT1A	0.652394
PDE10A	-0.709392
PDE1C	1.16796
PDE8B	0.714805
PDGFA	0.917719
PDK1	-0.605736
PDZK1	0.763361
PELO	-0.791982
PET112L	0.60028
PGM2L1	1.35504
PHLDA1	-0.743777
PHLDB2 /// PLCXD2	0.598277
PI3	-0.943402
PIGM	0.737815
PIH1D2	0.602282
PION	-0.794237
PLCL2	-0.686537
PLEKHA2	0.841025
PLEKHA7	0.798471
PLSCR1	-0.846968
PMS1	-0.635918
PNMA2	-1.1112
POLH	0.758439
PPAP2B	-0.784183
PPAP2C	-0.786232
PPAPDC1A	1.74895
PPFIA4	-0.763937
PPFIBP1	0.665165
PPM1A	0.695998
PPM1F	0.827595
PPP1R3B	0.731438
PPP2R2B	-0.676228
PPP3CC	0.612506
PRIC285	-0.852091
PROS1	-0.682028
PRRT1	-0.608436
PRSS3	-0.628066
PRUNE	0.686529
PSAT1	0.60273
PSG1 /// PSG3	-0.807524
PSG3	-0.964049
PSTK	0.731277
PTGER4	-0.641177
PTGIS	-0.818578
PTHLH	1.11493
PTPLB	0.741415
PTPRF	-0.638342
PTPRG	-0.708441
PTPRH	-0.58763
PTX3	-1.39285
QPCT	0.886859
RAB30	0.625796
RAB4A /// SPHAR	0.651058
RANBP17	-0.606382
RAP2A /// RAP2B	0.829594
RAP2B	0.757877
RARA	-1.05709
RARB	0.893132
RARRES1	-0.759225
RARRES3	-0.794541
RASEF	-0.86821
RBL1	0.618924
RBM33	0.65094
RCAN3	0.94944
RCBTB2	0.58549
RCSD1	0.602747
RDX	0.63396
REEP1	0.617357
REPS2	0.893986
RG9MTD2	0.610244
RGS17	-0.638422
RHEBL1	-0.618982
RHOBTB1	1.20491
RHOJ	1.08404
RIPK4	0.66121
RIT1	0.7788
RLN1 /// RLN2	-1.04505
RNASEH2B	0.614986
ROR1	-0.680037
ROR2	-0.816473
RPL23 /// SNORA21	0.603464
RPL27A	0.678591
RPP30	0.641683
RSAD2	-1.01155
RTKN	0.889673
RUFY2	0.620075
RUNDC2B /// RUNDC2C	-0.628226
SAA1 /// SAA2	-2.12244
SAMD9L	-0.674842
SARDH	-1.05934
SBF2	0.66155
SC5DL	0.927383
SCAMP4	0.839782
SCARF1	-0.601287
SCD	1.08052
SCD5	-0.664762
SCG2	-1.61711
SCIN	0.877058
SCN8A	-0.603194
SDPR	-0.945725
SDSL	0.635189
SEMA4B	-0.815654
SENP6	0.698923
SENP8	0.695289
SERHL /// SERHL2	0.670887
SERPINA1	-0.975448
SERPINB2	-2.33126
SERPINB5	1.87965
SETD3	0.614986
SETMAR	0.710403
SFRP1	-0.70941
SFRS18	-0.659135
SGCB	0.783102
SGEF	1.12895
SGK1	0.667913
SH2D3A	-0.589399
SH3BP5	0.693919
SH3GL3	-1.00217
SHISA2	-1.72088
SIX2	0.678754
SLC12A2	0.72482
SLC16A14	-0.652693
SLC1A3	0.997298
SLC25A15	0.63653
SLC25A27	-1.18298
SLC25A37	-0.746881
SLC26A9	-0.631064
SLC2A10	0.599441
SLC2A14 /// SLC2A3	-0.778525
SLC2A3	-0.99719
SLC35A2	0.698393
SLC35D1	0.768594
SLC39A9	0.625909
SLC3A1	0.837632
SLC6A13	0.626405
SLC6A6	0.595276
SLC7A11	0.634908
SLC7A5	0.58826
SLC8A1	-0.637925
SLC9A3	-0.625805
SLFN5	-0.60426
SLIT2	0.716377
SMARCD1	0.712707
SMARCD3	-0.620556
SMYD2	0.827686
SNAP25	-0.693351
SNHG7	-0.715086
SNRPN /// SNURF	-0.64521
SOD2	-1.05832
SOX7	-1.00448
SPAG4	-1.13713
SPANXA1 /// SPANXA2 /// SPANXB1 /// SPANXB2 /// SPANXC /// SPANXF1	0.704743
SPINT2	-0.793005
SPOCK1	-0.691336
SQLE	0.616404
SRGN	-0.636522
STAMBPL1	0.591785
STARD9	-0.818372
STC1	-1.23969
STK17B	1.02435
STK32A	0.677682
STK4	0.692562
STRN	0.627977
SULF1	0.931502
SULT4A1	-0.694416
SUPT6H	0.720383
SYN2	-0.723251
SYNJ1	0.67858
SYT17	-0.751927
SYTL2	-0.669656
TADA2L	0.813691
TAF6L	0.655247
TAGLN	0.689484
TBC1D20	0.623273
TBC1D22B	0.666762
tcag7.1238	0.597606
TCF4	0.764192
TCP11L1	0.714026
TEX10	0.590272
TFAP2C	0.999998
TFPI2	0.741254
TGFB1	0.585614
TGFBR1	-0.611852
TGFBR3	-0.6606
TGM2	0.911979
THAP8	0.642048
THNSL1	1.07203
TLR4	0.964675
TMCC3	-0.920376
TMEFF2	-0.663878
TMEM107	0.595971
TMEM110	0.707734
TMEM117	0.66888
TMEM17	0.692477
TMEM173	-0.58836
TMEM194B	0.670437
TMEM22	-0.726087
TMEM38A	-0.70914
TMEM38B	0.610824
TMEM64	0.65399
TMTC1	-1.20581
TMTC4	0.887244
TncRNA	-0.595453
TNFAIP2	-0.673649
TNFAIP3	-0.609896
TNFRSF21	-1.22616
TNFRSF9	-0.633579
TNFSF10	-0.681448
TNFSF14	-0.610668
TNNC1	0.705765
TP53I3	0.604175
TPBG	-0.691221
TPD52	-0.714777
TRIM36	-0.587448
TRIM6	-0.634644
TRIM66	0.682771
TRPC4	0.669086
TSC22D1	0.643746
TSPAN13	0.65668
TTC37	0.606502
TXK	0.746408
TXNIP	-0.724497
UBL3	0.729752
UCKL1	0.589585
UCP2	0.813874
ULK4	-0.640026
UPK1B	1.16183
UQCC	-0.793484
UROD	0.614108
USP18	-1.97648
UST	0.762359
VCAN	0.615266
VEPH1	0.698077
VGLL3	0.867776
VIPR1	0.757686
VNN1	-0.672888
VTI1A	0.937485
WASF3	0.584582
WNT3	0.668331
WNT5A	-0.788545
WNT8B	0.716387
WWC1	-0.797692
XAF1	-1.02468
YY2	0.604088
ZBED1	0.7459
ZBED2	-0.69531
ZBTB10	0.601285
ZBTB11	0.646535
ZBTB3	0.600149
ZC3H18	0.940173
ZDHHC20	0.608522
ZEB1	-0.67953
ZFP36L2	0.779198
ZFP82	0.760298
ZFX	0.678098
ZIC2	0.725996
ZNF117	0.623979
ZNF18	0.679877
ZNF215	-1.20284
ZNF26	0.653099
ZNF311	-0.592297
ZNF345	0.659914
ZNF41	0.716292
ZNF529	0.882026
ZNF583	0.743797
ZNF585A	0.805285
ZNF675	0.695198
ZNF709	0.706544
ZNF777	0.5872
ZNF788	-0.591704
ZNF800	0.792857
ZNF804A	1.53594
ZSCAN2	-0.655337
ZYG11B	0.660757

## Sheet: LungSCC signature - 1 
Gene Symbol	Log2 ratio lung SCC / normal lung
ABCA3	-2.38082
ABCA8	-1.20091
ABCB6	0.650765
ABCC1	0.823749
ABCC5	1.46292
ABI1	0.887525
ABLIM3	-1.16165
ACAA2	-0.634867
ACE	-0.673463
ACP5	-1.14561
ACSL1	-0.749038
ACTB	-1.00868
ACTG2	-1.152
ACTL6A	1.774
ACVRL1	-0.818579
ADAMTSL3	-1.11404
ADARB1	-1.42663
ADCY9	-0.880976
ADD1	-0.590745
ADFP	-0.761213
ADH1A	-1.61264
ADH1B	-2.9885
ADH1C	-0.83908
ADH7	2.28392
ADM	0.687061
ADNP	0.807355
ADRB2	-1.06492
AES	-0.691989
AGER	-3.51293
AGTR1	-0.666576
AHCY	0.823749
AHCYL2	-1.03801
AHNAK	-0.883635
AHNAK2	1.09085
AIF1	-0.85726
AKAP2 /// PALM2 /// PALM2-AKAP2	-1.87303
AKR1B10	2.0321
AKR1C1 /// AKR1C2	2.08746
AKR1C3	1.32193
ALDH2	-1.45403
ALDH3A1	1.82375
ALDH3B1	-1.1976
ALDH3B2	0.722466
ALDH4A1	-0.736966
ALDOA	0.62293
ALOX15B	-1.09234
ALOX5	-1.22095
ALOX5AP	-1.59074
ALPL	-0.810966
AMOTL2	-0.870387
AMY1A /// AMY1B /// AMY1C /// AMY2A /// AMY2B	-1.04394
ANG	-0.62371
ANGPT1	-1.1504
ANP32E	0.748461
ANPEP	-0.588574
ANXA2	0.83996
ANXA3	-1.98279
ANXA8 /// ANXA8L1 /// ANXA8L2	1.10434
AOC3	-1.62149
AOX1	-0.680382
AP1S2	-0.720232
AP2M1	0.650765
APLP2	-0.878321
APOBEC3B	1.1635
APOC1	-1.16165
AQP1	-2.32193
AQP3	-0.9771
AQP4	-1.08009
AREG /// AREGB	-0.821126
ARHGAP29	-1.03801
ARHGAP8 /// LOC553158 /// PRR5	0.773996
ARHGDIB	-0.929611
ARHGEF10	-0.828793
ARHGEF4	0.62293
ARHGEF6	-0.701342
ARRB2	-0.632629
ASAH1	-0.914575
ASNS	0.879706
ATF3	-0.715486
ATF5	0.594549
ATP11A	-0.957356
ATP11B	0.757023
ATP13A3	0.584963
ATP1B3	0.704872
ATP2A2	1.01436
ATP5G3	0.757023
ATP8A1	-0.8863
ATR	0.933573
ATXN10	0.726831
AURKB	0.933573
AXL	-0.701342
AZIN1	0.632268
B4GALT2	0.641546
B4GALT4	1.14405
BARD1	0.847997
BASP1	0.941106
BAX	-0.614845
BAZ1A	0.584963
BCAM	-0.595097
BCL11A	0.757023
BDH1	0.731183
BICD2	0.62293
BIK	0.704872
BMP2	-1.41504
BMP7	0.713696
BNIP3	0.613532
BOLA2	0.731183
BOLA2 /// LOC440354 /// LOC595101	1.11103
BOP1	0.956057
BTG2	-0.766112
BUB1B	1.41143
BUB3	0.748461
C10orf10	-1.44222
C10orf116	-1.699
C10orf72	-0.680382
C11orf9	-0.883635
C14orf132 /// LOC100132684	-0.962969
C14orf147	-0.841663
C14orf2	0.910733
C17orf91	-0.599462
C18orf10	0.594549
C19orf2	0.632268
C1orf38	-0.724993
C1QB	-1.46594
C1QBP	1.0635
C2	-0.965784
C4BPA	-1.87832
C5orf13	0.815575
C7	-2.08314
C7orf23	-0.873027
C9orf61	-0.668868
CA12	1.31615
CA4	-1.58641
CA9	0.669027
CACNA2D2	-1.71312
CAD	0.773996
CADM1	-1.58641
CALCRL	-0.78339
CALR	0.782409
CALU	0.678072
CAPN2	-0.768568
CASK	0.831877
CASP4	-0.675765
CASP6	0.594549
CAST	-0.668868
CAT	-1.17137
CAV1	-2.51457
CAV2	-0.854649
CBR1	0.62293
CBS	0.604071
CBX1	1.09761
CBX3 /// LOC644101 /// LOC653972	1.03562
CBX3 /// LOC653972	0.748461
CBX7	-0.72977
CCDC6	0.632268
CCDC69	-0.673463
CCL14 /// CCL15	-0.883635
CCL18	-1.04097
CCL2	-1.42663
CCL21	-0.78339
CCL4 /// CCL4L1 /// CCL4L2 /// LOC728835	-0.691989
CCNA2	0.83996
CCNB1	1.07724
CCNB2	1.12433
CCND3	-0.701342
CCNE2	0.722466
CCNF	0.678072
CCR1	-0.867752
CCRL2 /// LOC727811	-0.612637
CCT2	0.632268
CCT3	1.07724
CCT5	1.23879
CD151	-0.720232
CD163	-1.02915
CD24	1.20163
CD302	-0.929611
CD34	-0.635988
CD37	-0.854649
CD44	0.948601
CD52	-1.97143
CD53	-0.798366
CD55	-1.98279
CD59	-0.77596
CD63	-0.641604
CD68	-0.698998
CD69	-0.873027
CD74	-0.99137
CD81	-0.72738
CD93	-0.680382
CD97	-1.00578
CDC6	0.613532
CDH1	1.11103
CDH5	-1.51046
CDK4	0.782409
CDKN1C	-0.749038
CDKN2A	0.594549
CDKN3	1.17632
CDRT1 /// TRIM16 /// TRIM16L	0.910733
CEACAM6	-2.08927
CEBPB	-0.768568
CEBPD	-1.20091
CEBPG	0.815575
CEL	1.08066
CENPF	0.933573
CENTB2	0.669027
CES1 /// LOC652708	-0.99137
CFD	-1.95456
CFH	-0.652901
CFI	-0.788365
CFLAR	-0.621488
CH25H	-0.703689
CHAF1A	0.62293
CHI3L2	-1.1078
CHRDL1	-0.932361
CITED2	-1.8365
CKAP4	0.757023
CKMT1A /// CKMT1B /// LOC100133623 /// LOC731391	1.17632
CKS1B	1.28096
CKS2	0.910733
CLCA2	0.83996
CLDN10	1.0635
CLDN18	-2.72738
CLDN5	-1.6529
CLEC3B	-2.35107
CLIC4	-0.592919
CLIC5	-2.00578
CLNS1A	0.632268
CLSTN1	0.739848
CLU	-1.38082
CMAH	-0.590745
CNN1	-0.710756
CNN3	-0.650635
COBL	-1.26882
COL10A1	0.604071
COL11A1	2.50843
COL13A1	-0.639355
COL17A1	1.45418
COL1A1	1.28688
COL1A2	1.66448
COL3A1	1.71809
COL4A2	-0.603841
COL4A3	-0.83908
COL4A5	0.722466
COL4A6	0.765535
COL5A2	1.05658
COL7A1	1.12433
COPB2	0.782409
COX5A	0.9855
COX5B	0.608809
COX7A1	-1.27928
COX7B	0.731183
CPA3	-1.42663
CPM	-1.09234
CPVL	-0.72977
CRABP2	0.782409
CRIM1	-1.09542
CRIP1 /// LOC100127933	-1.5649
CRIP2	-0.77596
CSE1L	0.895303
CSF2RB	-0.736966
CSF3R	-1.03505
CSRP1	-0.988504
CST1 /// CST2 /// CST4	0.739848
CST6	-0.78339
CSTA	2.02503
CTGF	-0.72738
CTSD	-0.753896
CTSE	-0.866436
CTSG	-0.60165
CTSH	-1.62593
CTSK	0.739848
CTSL1	-1
CTSO	-0.614845
CTSZ	-0.664288
CX3CL1	-0.68966
CX3CR1	-0.621488
CXADR	0.604071
CXCL12	-0.72261
CXCL2	-1.82113
CXCL3	-0.698998
CXCR7	0.799087
CYB5A	-1.38836
CYC1	0.62293
CYCS	0.903038
CYP27A1	-0.875672
CYP2A6	-0.652901
CYP2B6 /// CYP2B7P1	-1.98279
CYP3A43 /// CYP3A5	-0.675765
CYP4B1	-0.913216
CYP4F11	0.594549
CYR61	-1.26882
DAB2	-0.99137
DAPK1	-0.891643
DARC	-1.30757
DARS	0.790772
DDR1	0.956057
DDX39	0.748461
DEFA1 /// DEFA3 /// LOC728358	-0.932361
DEK	0.918386
DENND3	-0.989936
DES	-0.810966
DHCR24	-0.948976
DKFZP564O0823	-0.736966
DLC1	-2.37333
DLEU1	1
DLG5	1.0072
DLX5	0.782409
DMBT1	-0.878321
DMN	-0.659723
DNAJC9	0.782409
DOCK4	-1.62593
DOCK9	-0.60165
DPM1	0.641546
DPT	-0.703689
DPYD	-0.905088
DPYSL2	-2.2863
DRG1	0.584963
DSC2	1.21412
DSG2	1.50589
DSG3	1.7137
DSP	3.67807
DST	1.58928
DUSP1	-1.8625
DUSP11	0.713696
DUSP3	-0.734563
DUSP6	-1.27928
DUSP8	-0.619271
DVL3	0.863938
ECM2	-0.894322
EDNRA	-0.808437
EDNRB	-0.790859
EEF1E1	0.704872
EFEMP1	-1.31833
EFS	0.757023
EGFR	0.584963
EIF2B5	0.650765
EIF2C2	0.584963
EIF3M	0.584963
EIF4G1	0.641546
EIF5	0.739848
EMG1	0.62293
EMP1	-0.588574
EMP2	-2.08927
EMP3	-1.24127
ENG	-1.49818
ENO1	0.604071
ENPP2	-0.892982
EPAS1	-0.682696
EPHA4	0.62293
EPHB3	0.731183
ERG	-1.05889
ETFA	0.584963
ETS2	-0.698998
ETV1	-0.701342
EVI2B	-0.865122
EYA2	0.669027
EZH2	0.910733
EZR	-0.734563
F13A1	-1.02034
F3	-0.643856
F8A1 /// F8A2 /// F8A3	0.604071
FABP4	-3.5632
FAM107A	-1.12343
FAP	1.48027
FAT	0.85599
FAT2	0.641546
FBL	1.0072
FBLN1	-1.1016
FBLN5	-1.61706
FBP1	-2.13289
FCER1G	-1.29336
FCGR2A	-0.841663
FCGR2A /// FCGR2B /// FCGR2C	-0.603841
FCGR3A	-1.39973
FCGR3B	-0.83908
FCGRT	-1.05289
FCN1	-1.42275
FCN3	-3.5547
FEN1	1.35614
FERMT2	-1.34373
FEZ1	-0.592919
FGFBP1	1.43296
FGFR3	0.941106
FGFR4	-0.785875
FGG	-1.9771
FGL2	-0.724993
FGR	-0.680382
FHL1	-2.78588
FHL2	0.782409
FIGF	-0.994241
FILIP1L	-0.741783
FKBP4	0.722466
FLJ39632	0.659925
FLJ41352 /// SMPD4	0.739848
FLNA	-0.597278
FMO2	-0.662004
FMO3	-0.821126
FN1	-0.588574
FOLR1	-1.44092
FOLR2	-0.655172
FOS	-1.25498
FOSB	-1.36216
FOXA1	0.757023
FOXA2	-0.756331
FOXC1	0.632268
FOXF1	-1.71786
FOXM1	1.05658
FRY	-0.844251
FSCN1	1.59455
FSTL3	-0.662004
FTH1	-0.664288
FXR1	0.731183
FXYD1 /// FXYD7	-1.2723
FXYD3	0.748461
FYN	-0.739372
FZD6	1.05658
G0S2	-1.1488
G3BP1	0.722466
GABBR1 /// UBD	0.807355
GABRE	0.757023
GADD45B	-1.09542
GAGE1 /// GAGE12B /// GAGE12C /// GAGE12D /// GAGE12E /// GAGE12F /// GAGE12G /// GAGE12H /// GAGE12I /// GAGE12J /// GAGE13 /// GAGE2A /// GAGE2B /// GAGE2C /// GAGE2D /// GAGE2E /// GAGE4 /// GAGE5 /// GAGE6 /// GAGE7 /// GAGE8	0.765535
GALC	-0.744197
GALNT1	0.757023
GALNT3	0.613532
GAPDH	1.21723
GARS	0.673556
GAS6 /// LOC100133684	-0.962969
GATA2	-0.83779
GCLC	1.60881
GCSH /// LOC729080 /// LOC730107	0.659925
GDF10	-1.11873
GGCT	0.871844
GGH	0.941106
GGT1 /// GGT2 /// GGT3P /// GGT4P /// GGTLC1 /// GGTLC2 /// GGTLC3	-1.20923
GGT1 /// GGTLC2	-0.788365
GINS1	1.53605
GJA1	0.695994
GJA4	-0.625934
GJB5	0.659925
GLRX	-1.03801
GLS	-0.813499
GMFG	-0.96016
GMPS	1.32769
GNAI1	0.613532
GNAI2	-0.694321
GNAQ	-0.678072
GNG11	-1.88364
GOT2	0.948601
GPC1	1.40054
GPC3	-1.54372
GPD1L	-0.771027
GPD2	0.641546
GPI /// LOC100133951	1.0072
GPM6A	-1.02034
GPNMB	0.85599
GPR116	-2.29336
GPR126	-0.985645
GPR56	0.594549
GPRC5A	-1.73216
GPX2	2.20789
GPX3	-2.01159
GRK5	-0.878321
GRN	-0.621488
GSR	0.704872
GSTP1	0.618239
GYPC	-0.816037
H1F0	0.925999
H1FX	0.613532
H2AFV	1.04963
H2AFX	1.07039
H2AFZ	1.15056
HAT1	0.823749
HBA1 /// HBA2	-2.80591
HBB	-2.80088
HBEGF	-0.736966
HBG1 /// HBG2	-0.793357
hCG_1781062 /// SRP9	0.669027
hCG_1998957 /// HLA-DQB1 /// HLA-DQB2 /// HLA-DRB1 /// HLA-DRB2 /// HLA-DRB3 /// HLA-DRB4 /// HLA-DRB5 /// HLA-DRB6 /// LOC100133484 /// LOC100133583 /// LOC100133661 /// LOC100133811 /// LOC651845 /// LOC730415 /// LOC731718 /// RNASE2 /// ZNF749	-1.62593
hCG_1998957 /// HLA-DQB1 /// HLA-DQB2 /// HLA-DRB1 /// HLA-DRB2 /// HLA-DRB3 /// HLA-DRB4 /// HLA-DRB5 /// LOC100133484 /// LOC100133583 /// LOC100133661 /// LOC100133811 /// LOC730415 /// RNASE2 /// ZNF749	-1.26188
hCG_1998957 /// HLA-DRB3	-1.18771
HDAC1	0.613532
HDAC2	0.85599
HDGF	1.07724
HEBP2	0.85599
HEG1	-0.981366
HES1	0.678072
HHLA1	1.12433
HIST1H1C	0.632268
HIST1H2AB /// HIST1H2AE	0.831877
HIST1H2BD	0.594549
HIST1H2BL	0.687061
HIST1H2BN	0.799087
HIST1H3D	0.650765
HIST1H4A /// HIST1H4B /// HIST1H4C /// HIST1H4D /// HIST1H4E /// HIST1H4F /// HIST1H4H /// HIST1H4I /// HIST1H4J /// HIST1H4K /// HIST1H4L /// HIST2H4A /// HIST2H4B /// HIST4H4	0.678072
HIST1H4C	1.10434
HIST2H2AA3 /// HIST2H2AA4	1.19535
HIST2H2BE	0.963474
HLA-B /// HLA-C /// MICA /// XXbac-BPG181B23.1	-0.619271
HLA-DMA	-1.24127
HLA-DMB	-0.664288
HLA-DPA1	-1.21759
HLA-DPB1	-1.3419
HLA-DQA1	-1.03209
HLA-DQB1	-1.30045
HLA-DRA	-1.12973
HLA-DRB4	-1.87832
HLA-E	-1.55216
HLA-F	-0.625934
HLTF	0.669027
HMGA1	1.9855
HMGB2	1.02857
HNRNPA1 /// LOC728844	0.604071
HNRNPA3 /// LOC728522	1.01436
HNRNPC /// HNRNPCL1 /// LOC440563 /// LOC646956 /// LOC649330	0.594549
HOPX	-2.03505
HOXC4 /// HOXC6	0.695994
HPGD	-1.21591
HPRT1	1.21412
HRAS	0.695994
HRASLS3	-0.91866
HSD17B4	-0.746616
HSD17B6	-1.64837
HSP90AA1	0.650765
HSP90AB1	0.584963
HSPA1A /// HSPA1B	0.695994
HSPA4L	0.641546
HSPB1	1.02857
HSPB6	-0.902389
HSPD1	0.970854
HSPE1	1.15056
HTATIP2	0.62293
HYAL1	-1.12029
HYAL2	-1.05289
IARS	0.713696
IARS2	0.748461
ICAM1	-1.74662
ICAM2	-1.35476
ID1	-0.627048
ID2 /// ID2B	-0.766112
IDH2	0.659925
IER2	-0.595097
IFI16	0.594549
IFI30	-1.06643
IFITM2	-0.836501
IFNGR1	-0.798366
IGF1R	0.650765
IGF2BP3	1.852
IGFBP2	2.03738
IGFBP3	0.847997
IGFBP4	-0.932361
IGFBP5	0.842644
IGFBP6	-0.771027
IGFBP7	-0.675765
IGH@ /// IGHG1 /// IGHG2 /// IGHG3 /// IGHG4 /// IGHM /// IGHV4-31 /// LOC100133739	0.956057
IGHG1	0.669027
IGHG1 /// IGHM /// IGHV@	0.678072
IGJ	-0.979942
IGSF3	1.09761
IL1R1	-1.12029
IL1RL1	-0.9771
IL32	-0.710756
IL4R	-0.643856
IL6	-2
IL6ST	-1.33279
IL7R	-1.28983
ILF2	0.641546
ILF3	0.815575
ILK	-0.617056
IMP4	0.863938
IRAK1	0.62293
IRF6	0.887525
ITGA1	-0.641604
ITGA3	-0.662004
ITGA6	1.01197
ITGA8	-0.708396
ITGAV	0.659925
ITGAX	-0.655172
ITGB2	-0.736966
ITGB4	1.07039
ITM2A	-1.43051
ITPR1	-0.655172
JAG1	1.10434
JUN	-0.588574
JUNB	-0.716671
JUND	-1.06341
JUP	0.992768
JUP /// KRT19	2.1375
KAL1	-1.25843
KANK3	-0.708396
KCNK1	0.782409
KCNK3	-0.773491
KCTD12	-0.880976
KDR	-0.590745
KIAA0101	1.24489
KIAA0256	-1.2109
KIAA0494	-0.628162
KIAA0802	0.782409
KIAA0894	-0.588574
KIAA0907	0.687061
KIAA1462	-1.02621
KIF11	1.26903
KIF14	0.641546
KIF2C	0.731183
KLF10	-0.657445
KLF5	0.871844
KLF6	-1.15843
KLF9	-1.46594
KPNA2 /// LOC728860 /// MGC40489	0.992768
KRT10	0.83996
KRT13	2.26303
KRT14	3.08746
KRT15	2.49825
KRT16	2.0036
KRT17	1.68257
KRT5	4.47249
KRT6A	4.06867
KRT7	-1.65745
LAD1	1.01436
LAMA2	-0.836501
LAMA4	-0.905088
LAMB2	-0.891643
LAMB3	0.722466
LAMC2	0.613532
LAMP3	-2.07097
LAPTM4B	0.871844
LAPTM5	-0.880976
LCN2	0.895303
LCP1	-1.08927
LDB2	-1.23107
LDHA	0.823749
LDLR	-1.09851
LEPROT	-0.606035
LGALS3	-0.612637
LGALS7 /// LGALS7B	2.19535
LILRA2	-0.634867
LILRB3	-0.985645
LIMCH1	-1.0145
LIMK2 /// PPP1R14BP1	0.956057
LITAF	-0.625934
LMNA	-0.617056
LMNB1	0.799087
LMNB2	0.887525
LMO2	-0.894322
LMO3	-1.39593
LMO7	-0.805913
LMOD1	-0.687335
LOC100129361	0.594549
LOC100132247 /// LOC100132688 /// LOC23117 /// LOC348162 /// LOC440345 /// LOC641298 /// LOC642799 /// LOC728741 /// LOC729602	0.641546
LOC100132430	0.731183
LOC100133481	0.748461
LOC100133684	-0.932361
LOC100134190 /// LRP1	-0.682696
LOC100134331	0.62293
LOC284889 /// MIF	1.47508
LOC441259 /// LOC730324 /// PMS2L1 /// PMS2L5	0.799087
LOC441259 /// PMS2L1 /// PMS2L5 /// TBX18	0.83996
LOC731049 /// UBE2S	1.29278
LOC92755 /// TUBB	0.773996
LOXL1	0.613532
LPCAT1	-1.85726
LPHN2	-0.608232
LPL	-2.06492
LRPAP1	-0.68966
LRRC32	-1.17788
LSM7	0.613532
LSP1	-0.659723
LSR	1.09085
LTA4H	-1.22095
LTBP4	-0.680382
LTF	0.695994
LY6D	1.0635
LYPD3	0.978196
LYPLA1	0.933573
LYZ	-1.19429
MACF1	-1.18771
MAFF	-0.946194
MAGEA1	0.748461
MAGEA12	0.687061
MAGEA2 /// MAGEA2B /// MAGEA6	0.659925
MAGEA3 /// MAGEA6	1.04614
MAGEA4	0.970854
MAGEA5	0.731183
MAGED1	0.62293
MALL	-0.713119
MAN2B2	-0.625934
MAOA	-1.2665
MAOB	-0.83908
MAP1LC3B	-0.617056
MAP4	-0.666576
MAPK13	0.632268
MAPK6	1.11103
MAPRE2	-0.606035
MARCKS	1.0072
MARCKSL1	0.757023
MARCO	-1.89432
MAZ	0.773996
MCL1	-0.784632
MCM2	0.963474
MCM4	0.933573
MCM5	0.782409
MCM6	1.18269
MCM7	0.963474
MDFI	1.17632
MDH1	0.604071
MDK	0.883621
ME1	0.807355
MEIS3P1	-0.646112
MEOX2	-0.72977
MEST	0.650765
METAP1	0.992768
METTL7A	-1.08314
MFAP4	-2.13289
MFN1	0.678072
MGLL	-1.17788
MKI67	0.584963
MLLT11	1.40599
MMP1	1.46467
MMP10	0.594549
MMP11	1.07724
MMP12	1.89918
MMP7	0.678072
MMP9	1.65992
MNDA	-1.18442
MRC1 /// MRC1L1	-2.29336
MRPL12	0.62293
MRPL3	1.37851
MRPS12	1.0072
MS4A2	-0.632629
MSH2	0.739848
MSH6	0.895303
MSLN	-0.710756
MSN	-0.83908
MSR1	-0.780909
MT1A	-0.72261
MT1B	-0.646112
MT1E	-0.91866
MT1F	-0.671164
MT1F /// MT1G /// MT1M /// MT1P3	-0.630394
MT2A	-1.24127
MTA1	0.744161
MTHFD1	0.650765
MTHFD2	1.38957
MTMR1	0.713696
MTSS1	0.739848
MTUS1	-0.621488
MUC1	-1.39688
MVP	-0.793357
MXRA5	0.903038
MYBL2	1.24489
MYH10	-0.836501
MYH11	-1.47313
MYL9	-1.2863
MYLK	-0.940645
NBL1	-0.625934
NCALD	-0.612637
NCAPD2	0.773996
NCBP2	1.0036
NCF2	-0.883635
NCF4	-0.621488
NCKAP1	0.739848
NCKAP1L	-0.60165
NDC80	1.13093
NDN	-0.671164
NDRG1	0.863938
NDUFB5	0.925999
NDUFS6	0.604071
NEBL	-0.870387
NEDD4L	-0.84944
NEDD9	-0.766112
NFE2L2	0.687061
NFIB	-0.772259
NFKBIA	-1.31115
NKX2-1	-1.5043
NME1 /// NME1-NME2 /// NME2	1.17632
NME1 /// NME2	1.06695
NME1-NME2 /// NME2	0.790772
NME2	0.807355
NMT1	0.641546
NMU	0.678072
NNMT	-0.880976
NOL1	0.669027
NOL5A	0.731183
NOTCH3	0.815575
NOTCH4	-0.800877
NPC2	-1.09234
NPM3	0.584963
NPR1	-0.940645
NQO1	0.722466
NR2F1	-0.878321
NR4A1	-1.62371
NR4A2	-0.740577
NR4A3	-0.697827
NRGN	-1.22432
NTRK2	0.953576
NTS	2.37573
NUDT1	0.632268
NUP153	0.594549
NUP155	0.83996
NUP205	0.782409
OAT	0.731183
ODC1	1.22959
OLR1	-1.87832
P2RY14	-0.778432
PABPC1	0.757023
PAICS	1.70487
PAK1	0.827819
PAK2	0.608809
PAPSS2	-0.724993
PARD3	0.678072
PARP1	0.790772
PAWR	0.713696
PCCB	0.757023
PCDH17	-0.694321
PCDH9	-0.8863
PCNA	1.16672
PCTK1	0.589763
PDAP1	0.613532
PDCD10	0.695994
PDCD6	0.659925
PDE4B	-0.671164
PDLIM3	-0.821126
PDZD2	-1.01742
PECAM1	-1.7992
PER1	-0.590745
PFKP	0.992768
PFN2	2.03738
PGAM1	0.669027
PGAP1	0.739848
PGC	-2.68038
PGD	0.669027
PGK1	0.748461
PGM1	-0.60165
PHLDA2	1.03562
PHYH	-0.603841
PI3	1.41143
PION	-0.724993
PIP5K1B	-0.785875
PIR	1
PITX1	1.16993
PKIG	-1.01742
PKM2	0.790772
PKP1	0.765535
PKP3	0.790772
PLA2G1B	-1.03209
PLAU	0.863938
PLCH2	0.823749
PLOD2	1.4489
PLP2	0.584963
PLXND1	-0.680382
PMAIP1	0.773996
PMP22	-1.32916
PMS2L3	0.659925
PNN	0.604071
PNO1	0.613532
PNPLA6	-1.17788
PODXL	-1.09851
POLE3	0.823749
POLR2H	0.9855
PON3	-0.60165
POSTN	1.76977
POU2AF1	0.790772
PPAP2B	-0.761213
PPARG	-0.739372
PPBP	-0.880976
PPP1R12B	-0.617056
PPP1R15A	-0.946194
PPP1R2	0.687061
PRAME	1.20789
PRDX2	0.695994
PRDX4	0.895303
PRKCI	0.78799
PRKCZ	-0.715486
PRKDC	0.710761
PRKY	0.62293
PROS1	-1.02621
PRPF19	0.704872
PRPF40A	0.641546
PRPS2	1.02857
psiTPTE22	1.07724
PSMA2	0.594549
PSMA3	0.739848
PSMA4	0.62293
PSMC6	0.613532
PSMD10	0.604071
PSMD11	0.895303
PSMD14	0.925999
PSMD2	0.863938
PSPH	1.16993
PTDSS1	0.678072
PTGDS	-1.30163
PTGES3	0.722466
PTGIS	-0.891643
PTGS2	-0.662004
PTHLH	1.47508
PTP4A2	-0.621488
PTPRB	-1.49208
PTPRC	-0.854649
PTPRF	0.807355
PTPRM	-1.00771
PTPRZ1	1.38405
PTRF	-0.92139
PTS	0.83996
PTTG1	0.970854
PTX3	-0.650635
PURA	-0.646112
PVT1	0.641546
PYCR1	0.594549
PYGL	0.992768
QKI	-1.39593
QSOX1	-0.62371
R3HDM1	0.678072
RAD21	0.831877
RAMP2	-1.52699
RAMP3	-1.48197
RAN	1.04264
RANBP1	1.09085
RANGAP1	0.678072
RAPGEF2	-0.785875
RAPGEF5	-0.637109
RARA	-0.595097
RARRES2	-0.940645
RARRES3	-0.84944
RASGRF1	-0.592919
RASSF2	-0.865122
RBP1	1.40054
RBP4	-1.30045
RBPMS	-0.770535
RCAN2	-0.619271
RCN2	0.613532
RECK	-0.603841
REEP5	-0.739372
RFC4	1.34767
RFTN1	-1.08314
RGL1	-0.875672
RGS2	-1.23447
RGS3	-0.666576
RGS5	-0.75877
RHOA	-0.659723
RHOB	-0.962969
RHOBTB2	-1.13289
RIF1	0.757023
RIT1	0.584963
RNASE1	-2.38082
RNASE4	-1.00868
RNPS1	0.584963
RPA1	0.803227
RPGR	-0.720232
RPS15A	0.695994
RPS6KA2	-0.989936
RPS7	0.650765
RRAD	-1.31115
RRAS	-0.845546
RRM1	0.757023
S100A10	-0.717857
S100A11	0.748461
S100A2	3.66107
S100A4	-1.83136
S100A7	0.879706
S100P	0.641546
SAA1 /// SAA2	0.748461
SASH1	-0.666576
SCEL	-0.687335
SCGB1A1	-2.74662
SCNN1B	-0.691989
SDC1	0.722466
SDC4	-1.08314
SDCBP	-0.778432
SEC61G	0.687061
SELENBP1	-2.13289
SELP	-0.701342
SEMA3B	-1.09234
SEPP1	-1.09851
SERBP1	0.863938
SERPINA1	-1.8365
SERPINB3	1.61824
SERPINB3 /// SERPINB4	1.26303
SERPINB5	2.52607
SERPINB6	-0.823677
SERPINE2	1.20163
SERPING1	-1.15843
SFN	1.7845
SFRS9	0.722466
SFTPB	-2.9771
SFTPC	-3.95009
SFTPD	-2.13289
SFXN3	-0.72977
SGCE	-0.75877
SH3BP5	-1.23786
SHFM1	1.07039
SHMT2	0.632268
SIAH2	1.07039
SIX1	1.0072
SLA	-0.696658
SLC11A1	-0.940645
SLC16A1	0.604071
SLC16A4	-0.929611
SLC1A1	-0.710756
SLC1A4	0.765535
SLC1A5	0.669027
SLC20A2	0.70044
SLC25A1	0.678072
SLC25A5	0.799087
SLC2A3	-0.798366
SLC35A1	-0.60165
SLC39A6	0.831877
SLC39A8	-2.45008
SLC6A4	-1.18442
SLC6A8	1.09424
SLC7A1	1
SLC7A5	1.70929
SLC7A7	-0.816037
SLC9A3R1	1.14405
SLCO2A1	-0.833927
SLCO2B1	-0.935117
SLIT2	-1.68501
SLPI	-1.32193
SMAD1	0.632268
SMAD6	-0.929611
SMAD7	-0.687335
SMARCA4	0.613532
SMARCD3	-0.675765
SMC1A	0.765535
SMC4	1.10434
SMG7	0.62293
SNF1LK	-0.83908
SNRK	-0.700169
SNRPB	0.87578
SNRPD2	0.731183
SNRPE	1.08406
SNRPF	1.02148
SNRPG	0.992768
SNRPN /// SNURF	-0.706041
SOD3	-0.713119
SORD	1.41143
SOSTDC1	-0.641604
SOX2	2.05137
SOX4	0.963474
SOX9	0.641546
SPAG6	-0.826233
SPARCL1	-1.93788
SPAST	0.650765
SPI1	-0.773491
SPINT2	0.659925
SPOCK2	-1.80591
SPP1	3.25248
SPRR1A	1.32769
SPRR1B	2.59455
SPRR2D	0.659925
SPTAN1	-0.678072
SPTBN1	-0.72142
SQLE	0.823749
SRD5A1	0.669027
SRGN	-1.11404
SRI	-0.637109
SRPK1	0.62293
SSBP1	0.794936
SSRP1	0.613532
ST3GAL5	-0.924125
STAC	-0.637109
STARD13	-0.680382
STAT1	0.690045
STEAP1	0.669027
STOM	-1.1078
STOML2	0.687061
STRAP	0.678072
STX12	-0.844251
STXBP1	-0.77596
SUB1	0.722466
SULF1	1.68257
SULT1A1	-0.603841
SULT1A1 /// SULT1A2 /// SULT1A3 /// SULT1A4	-0.668868
SVEP1	-0.937878
SYNCRIP	0.731183
SYNE1	-1.152
SYNPO	-0.780909
SYPL1	0.613532
TACC1	-1.34373
TACSTD1	0.604071
TACSTD2	0.910733
TAGLN	-0.795859
TAL1	-0.619271
TARS	1.01436
TBL1X	0.632268
TBX2	-1.14561
TCF21	-1.94898
TCFL5	0.604071
TCP1	0.632268
TDG	0.695994
TEK	-2.46594
TENC1	-0.878321
TFAP2A	1.72247
TFDP2	0.604071
TFPI	-1.92687
TFRC	0.584963
TGFBR2	-1.88098
TGFBR3	-1.34008
TGIF1	0.704872
TGM2	-1.25498
THBD	-0.937878
THBS2	1.36457
TIAL1	0.678072
TIE1	-0.943416
TIMP3	-1.09851
TK1	1.1635
TLK1	0.678072
TLN1	-0.778432
TMED10	0.678072
TMEM106C	0.887525
TMEM158	0.782409
TMEM47	-1.12029
TMF1	0.790772
TMPRSS2	-0.599462
TMSB4X	-0.685014
TNC	0.765535
TNFRSF1B	-0.649503
TNFRSF25	0.669027
TNFSF12 /// TNFSF12-TNFSF13 /// TNFSF13	-0.883635
TNNC1	-1.22095
TNXA /// TNXB	-1.3474
TOMM20	0.594549
TOMM34	0.773996
TOMM70A	0.650765
TOP2A	1.16779
TOPBP1	0.963474
TP63	2.63227
TPBG	0.807355
TPI1	0.831877
TPSAB1 /// TPSB2	-1.0499
TPSAB1 /// TPSB2 /// TPSD1	-1.9105
TPX2	1.48543
TRAP1	0.594549
TRIM2	0.9855
TRIM29	2.46989
TRIP13	0.748461
TSC22D1	-0.628162
TSC22D3	-1.41889
TSPAN4	-0.741783
TSPAN5	0.594549
TSPAN8	-1.22432
TTK	0.956057
TUBA1A	-0.946194
TUBG1	0.584963
TWF1	0.941106
TXN	1.02857
TXNIP	-1.06492
TXNRD1	0.731183
TYMS	0.803227
TYROBP	-1.5951
UBA2	0.910733
UBA7	-0.673463
UBE2C	1.09761
UBE2E3	0.632268
UBE2L3	0.594549
UBE2S	1.19535
UBXN7	0.910733
UCHL1	1.39506
UCK2	0.704872
UGT1A1 /// UGT1A10 /// UGT1A3 /// UGT1A4 /// UGT1A5 /// UGT1A6 /// UGT1A7 /// UGT1A8 /// UGT1A9	2.32769
UGT8	0.704872
UMPS	0.584963
UNC13B	-0.867752
UNG	1.03562
UPK1B	1.03562
UQCRFS1	0.678072
UQCRH	0.863938
VAMP2	-0.628162
VAMP5	-0.932361
VAT1	-0.768568
VBP1	0.632268
VCAN	0.722466
VDAC2	0.863938
VIM	-1.32193
VIPR1	-1.8625
VRK1	0.659925
VSIG4	-1.20091
VWF	-2.26534
WASF1	0.584963
WDR43	0.584963
WEE1	0.782409
WFS1	-0.982791
WIF1	-2.4112
WISP2	-0.595097
WNT5A	0.952334
WSB1	-0.751465
WWTR1	-0.592919
XIST	-0.685014
XPO1	0.757023
XPOT	0.823749
YWHAQ	0.691534
YWHAZ	0.903038
YY1	0.887525
ZBTB16	-1.95456
ZBTB20	-0.595097
ZC3H15	0.650765
ZCCHC24	-0.666576
ZEB2	-0.739372
ZFP36	-1.55639
ZFP36L2	-0.862496
ZNF146	0.799087
ZNF217	0.782409
ZWINT	1.85997
ZYX	-0.590745

## Sheet: Lung SCC signature - 2 
Gene Symbol	Log2 ratio lung SCC / normal lung
13CDNA73	-1.84348
54TM	1.95243
A2M	-2.5853
AADAC	-2.03483
ABCA3	-4.60174
ABCA6	-2.36948
ABCC5	1.90897
ABCF1	-1.62257
ACK1	-1.70595
ACVRL1	-1.99718
ADA	2.35175
ADAM12	2.12374
ADE2H1	2.65763
ADH1B	-4.36525
ADPRTL2	1.75029
ADRB2	-3.40388
AF1Q	1.86405
AFP	2.55522
AGER	-4.79397
AGR2	-1.87728
AGT	1.80229
AHCY	1.67249
AIF1	-2.28711
AK1	-1.86762
ALB	3.32428
ALDH3B1	-2.47252
ALOX15B	-2.31969
ALOX5	-3.62005
ALPL	-3.21286
AMD1	1.83838
AMY2A	-2.64084
ANK2	-2.43332
ANKT	2.17517
ANKTM1	2.52063
ANXA13	3.16957
AOC3	-3.08035
AP1S1	2.50903
APG-1	2.82665
APM2	-2.19404
APOB	2.16884
APOC1	-2.14225
APOD	-2.0639
AQP1	-3.71726
AQP3	-2.86705
AQP4	-4.27388
AQP9	-3.26918
AREG	-2.84203
ARHB	-2.09168
ARIH1	1.64897
ARNTL2	1.62025
ARRB1	-2.18285
ASAH	-2.87129
ASAHL	-2.12477
ASNS	2.36373
ATF3	-1.97545
ATP11A	-2.11514
ATP5J2	1.9826
ATP6B1	-1.7763
ATP6N1B	-1.8363
B2M	-1.88118
B4-2	-2.09523
BAF53A	1.86949
BCL2A1	-1.59782
BDH	2.44527
BENE	-3.04774
BEX1	2.37458
BIRC5	1.92249
BK65A6.2	-4.0818
BMP2	-1.92438
BMP4	1.79903
BMP7	2.60513
BPAG1	2.4838
BRCA2	1.66633
BUB1	2.18258
BUB1B	3.75869
C11orf14	1.84917
C1orf6	1.60046
C1QA	-3.03062
C1QB	-2.82435
C1QR	-3.73418
C2	-2.30982
C20orf1	4.17925
C3AR1	-2.34
C4BPA	-4.7032
C5orf4	-1.86675
C7	-2.63683
CA6	1.91003
CA9	-1.88211
CABP3	-1.83791
CACNA2D2	-3.38537
CALCRL	-3.98882
CAMP	-2.56996
CAPG	-1.68365
CAPN3	-2.39075
CAPN9	-2.46688
CART1	2.16558
CASP3	2.25457
CASP8AP2	1.58937
CAV1	-2.50111
CAV2	-2.41836
CC1.3	1.6097
CCNA2	3.35805
CCNE1	2.26702
CCT4	1.82595
CCT5	2.04066
CD163	-2.64202
CD34	-2.08478
CD36	-2.62995
CD37	-3.23472
CD4	-2.61356
CD53	-2.66287
CD68	-2.95483
CD69	-2.15126
CD86	-1.64226
CD8B1	1.80083
CDC2	2.95426
CDC20	3.21268
CDC25C	1.72648
CDC45L	2.91271
CDC6	3.4732
CDC7L1	1.74948
CDH17	1.68014
CDH24	1.76315
CDH5	-3.42511
CDK5R1	-1.66837
CDK6	1.78166
CDKN1C	-1.96418
CDKN3	2.93527
CEACAM6	-3.61082
CENPE	2.99802
CENPF	3.30105
CGI-44	-1.67156
CGN	-1.90505
CHAF1A	2.27806
CHAF1B	1.88798
CHC1	2.08038
CHEK1	2.57562
CHI3L2	-3.3856
CHIT1	-2.0747
CHST1	2.45517
CISH	-2.09372
CITED2	-2.41889
CKAP2	2.65731
CKS2	2.15175
CKTSF1B1	1.58538
CLC	-1.94626
CLDN5	-2.48594
CLIC2	-2.01369
CMAH	-2.78765
CMRF35	-1.91317
CNAP1	2.22072
CNOT3	-1.94271
CNR1	-1.60688
CNTN6	-2.08974
CNTNAP2	2.2389
COL11A1	1.93038
COL17A1	1.66455
COL21A1	-1.62129
COL3A1	1.71295
COL5A2	1.6586
COL7A1	3.19838
COPA	1.63922
COPEB	-2.03567
CPA4	1.83837
CPM	-3.40629
CPSF5	2.06878
CPX-1	2.5756
CRHSP-24	1.63512
CRIP1	-1.83591
CRTAC1	-3.22935
CRYM	-2.84709
CSE1L	2.26602
CSF2RB	-2.18293
CSF3R	-2.4313
CST3	-1.58434
CTGF	-1.77471
CTSD	-1.73468
CTSE	-2.1196
CTSH	-3.17378
CTSS	-2.70583
CUGBP2	-1.64265
CXCL16	-2.63842
CYB5	-2.94508
CYBB	-1.67638
CYC1	1.71529
CYP1B1	-2.08337
CYP26A1	1.9891
CYP27A1	-2.03477
CYP2A7	2.34755
CYP4B1	-1.91129
CYP51	-2.43672
CYR61	-1.85355
DAB2	-1.67894
DAF	-3.12748
DAPK1	-2.1113
DCT	-2.87234
DDX11	2.07796
DEPP	-3.40004
DIA4	1.76226
DJ462O23.2	-1.73635
DJ551D2.5	1.59605
DJ616B8.3	3.61466
DKC1	1.70582
DKFZP434A1315	2.1295
DKFZP434B168	1.80181
DKFZp434D0513	-1.895
DKFZP434F0318	-2.12024
DKFZP434K1772	-2.43965
DKFZp434N127	-2.17063
DKFZp547D155	2.29777
DKFZp547N157	1.96777
DKFZP564D166	-1.79223
DKFZP564O0423	3.27448
DKFZP566D1346	-2.36489
DKFZP566N034	-2.2626
DKFZP586A0522	-1.58949
DKFZP586D2223	1.72578
DKFZp762E1312	2.60493
DKK1	2.55468
DKK2	-2.1049
DLEU1	1.65122
DLEU2	2.20042
DLK1	2.16949
DLX4	2.11637
DLX5	2.3292
DMRT2	2.31708
DNAI1	-1.75346
DNM1L	1.63874
DOC1	-1.97018
DOK2	-3.61337
DONSON	1.81295
DPP4	-2.18122
DPT	-2.03385
DPYSL2	-2.62908
DPYSL4	2.25084
DRIL1	1.76623
DSC3	2.55011
DSCR1L1	-1.83808
DSIPI	-1.85084
DSP	1.66938
DTR	-1.73868
DTYMK	1.59472
DUSP6	-2.18219
E2F1	2.44528
E2IG4	2.32505
ECEL1	1.72017
ECM2	-2.21413
EDG1	-3.31357
EDN3	-1.58495
EDNRA	-1.92892
EDNRB	-3.08454
EFEMP1	-2.80972
EGFL5	-1.63683
EGLN3	1.78851
EGR1	-2.297
EIF2B3	2.83892
EIF4A2	1.86798
ELN	-1.86674
EMP2	-2.54417
EPAS1	-3.59242
EPHB2	1.86137
EPHB3	1.76917
EPS15	-1.67334
ERCC4	1.93797
ETFB	1.97491
ETL	-2.69952
ETV4	3.06993
EVI2B	-2.18608
F13A1	-3.18957
F8	-2.21693
FABP1	2.27748
FABP3	-2.49581
FABP4	-3.12756
FACL2	-1.90323
FASN	2.11286
FAT	2.03152
FAT2	2.51531
FBN2	2.50323
FBP1	-3.20169
FCER1G	-1.965
FCGR2A	-2.8217
FCGR2B	-2.30017
FCGR3B	-2.50025
FCGRT	-1.92034
FEN1	1.85212
FETUB	1.71092
FGF7	-2.02328
FGG	-1.95992
FGL2	-2.52955
FGR	-1.85535
FHIT	-1.59597
FHL1	-2.60249
FIP2	-1.761
FJX1	2.25052
FKBP1A	1.80922
FLJ10036	2.34345
FLJ10101	-2.68605
FLJ10147	-1.61249
FLJ10160	-2.1642
FLJ10290	-2.10692
FLJ10468	3.08148
FLJ10540	2.67115
FLJ10604	2.33948
FLJ10628	1.9342
FLJ10814	1.61223
FLJ10970	-2.37548
FLJ11110	-3.42049
FLJ11129	-2.67443
FLJ11252	1.93282
FLJ11259	-1.65217
FLJ11296	-2.81558
FLJ11767	-2.40365
FLJ11807	-2.31555
FLJ11808	2.31014
FLJ12443	-2.10426
FLJ12604	-2.55573
FLJ12666	-1.62303
FLJ12888	1.70871
FLJ13117	1.64129
FLJ14103	-1.97768
FLJ14502	1.84505
FLJ14761	2.21054
FLJ20216	1.74872
FLJ20311	2.37292
FLJ20366	-2.37428
FLJ20450	1.64265
FLJ20485	1.78862
FLJ20500	2.26018
FLJ20581	-1.84204
FLJ20605	-2.20633
FLJ20628	1.72467
FLJ20701	-2.56151
FLJ20746	1.62789
FLJ20772	1.87135
FLJ20798	-3.2123
FLJ20909	-2.02106
FLJ21168	1.67083
FLJ21212	-1.67795
FLJ21522	-2.2505
FLJ21945	1.76632
FLJ22009	2.85458
FLJ22041	1.61051
FLJ22662	-2.06932
FLJ22865	1.76831
FLJ22940	1.67913
FLJ23056	-1.64602
FLJ23153	-4.00172
FLJ23191	-3.69786
FLJ23311	2.38892
FLJ23356	-1.9605
FLJ23462	-2.17973
FLJ23468	2.46953
FLRT3	-2.47651
FMO3	-1.85707
FMO5	-2.26485
FNTA	-2.90108
FOLR1	-4.53972
FOLR2	-3.63851
FOLR3	-1.92966
FOS	-1.86214
FOXD1	2.60262
FOXJ1	-1.61892
FOXM1	2.48554
FPGS	-2.1345
FPR1	-3.20437
FPRL1	-2.05488
FRZB	-1.89402
FST	3.63395
FTCD	1.66807
FUCA1	-2.14825
FXYD1	-1.95122
FYCO1	-1.68235
GABARAP	-1.75778
GALNT2	2.17922
GARP	-3.10038
GART	1.90445
GATA2	-1.9115
GATA6	-2.14697
GCA	-1.6611
GCHFR	-1.63983
GCSH	1.70191
GDA	2.56038
GEM	-1.72817
GENX-3414	-2.38325
GGH	2.2526
GJA4	-1.78392
GJA5	-2.17443
GJA7	1.80751
GJB5	1.91673
GMPS	2.35114
GNLY	-2.68673
GP2	-3.07785
GPA33	-1.80025
GPM6A	-2.42508
GPR1	1.80066
GPR105	-1.87862
GPR86	-2.35198
GPRK5	-3.47562
GPX2	3.21094
GPX3	-2.20412
GRO1	-2.01228
GRO2	-2.69711
GRP	-1.97539
GSTA3	-1.68854
GSTM5	-2.40966
GTF3C3	1.7048
GTSE1	2.5808
GUCY2C	1.6672
GZMA	-2.08137
H4FG	3.25277
HBA2	-2.31374
HBE1	-2.18794
HBG2	-2.36655
HBP17	2.09128
HCK	-2.36642
HEC	2.45631
HELLS	2.36
HERC2	2.76766
HEYL	-2.22405
HFL1	-1.7842
HLA-C	-1.93083
HLA-DMA	-2.87466
HLA-DPA1	-2.90114
HLA-DPB1	-2.6956
HLA-DQA1	-3.21498
HLA-DQB1	-2.44727
HLA-DRB1	-2.82972
HLA-DRB5	-3.00142
HMG2	1.78495
HMGIY	2.62995
HMMR	2.85074
HN1L	1.77589
HOOK2	1.61908
HOXB7	2.06951
HPD	2.63658
HPGD	-2.86093
HR	1.96137
HSJ001348	2.29065
HSPC002	1.69348
HSPC150	3.19948
HSPC156	-1.67182
HSPC216	3.18231
HTR3A	1.77675
HU-K5	-1.89917
HUMAUANTIG	-2.85422
HXB	2.21718
HYAL1	-1.79446
HYAL2	-1.65108
HZFW1	-1.89642
ICAM4	-2.72722
ICB-1	-1.9928
ICSBP1	-1.96545
ID4	-2.05165
IDS	-1.62268
IFI30	-2.06818
IFITM2	-1.6244
IGFBP3	2.13638
IGL@	1.98184
IGSF2	-1.97395
IGSF4	-2.23939
IL10RA	-2.66745
IL13RA2	1.95194
IL1RL1	-1.62068
IL1RN	-2.33125
IL2RB	-1.78413
IL6	-2.64643
IL7R	-1.79925
ILT7	-2.26645
INHBB	-1.81687
ITGA1	-1.63989
ITGA2	1.76577
ITGA8	-2.27528
ITGAL	-1.97499
ITGAM	-2.05542
ITGAX	-1.99097
ITGB1	1.8736
ITGB2	-1.91912
ITIH2	2.23785
ITLN	-3.44375
ITPR3	-2.72432
JAM2	-2.02466
JPO1	2.67099
JUN	-2.02616
JUNB	-1.67488
JUND	-1.67495
KAL1	-2.14812
KCNJ11	-2.073
KCNJ15	-3.00653
KCNK3	-2.3664
KCNMB1	-1.87613
KIAA0008	3.15262
KIAA0013	2.74148
KIAA0022	-2.95488
KIAA0042	1.74643
KIAA0074	2.28826
KIAA0096	-1.67978
KIAA0101	3.4776
KIAA0123	1.6855
KIAA0132	1.74399
KIAA0146	-2.86705
KIAA0153	1.70338
KIAA0179	2.22546
KIAA0186	2.5728
KIAA0275	-1.6471
KIAA0277	-1.99349
KIAA0300	-2.5286
KIAA0303	-1.61442
KIAA0352	2.24012
KIAA0576	-1.71271
KIAA0683	1.90192
KIAA0758	-4.20311
KIAA0802	1.88452
KIAA0846	-1.74438
KIAA0887	1.60182
KIAA0903	1.71285
KIAA0911	1.7287
KIAA0937	-1.6144
KIAA1002	-2.29447
KIAA1102	-3.536
KIAA1150	1.64606
KIAA1204	-2.12753
KIAA1454	-1.90174
KIAA1462	-2.83642
KIAA1463	1.61768
KIAA1517	2.11914
KIAA1538	-1.71844
KIAA1634	-2.46335
KIAA1681	-1.71978
KIAA1789	-2.03478
KIAA1912	-1.64563
KIF3C	1.99755
KIT	-2.39592
KLF4	-2.71972
KMO	-1.6195
KNSL1	2.89343
KNSL2	2.19557
KNSL4	2.05388
KNSL5	2.81918
KOC1	1.70991
KPNA2	2.70655
KPNB2	1.81363
KRT13	2.42167
KRT17	3.11281
KRT19	1.71935
KRT5	3.63786
KRT6B	3.24043
L1CAM	1.95745
LALP1	2.24231
LAMA2	-2.00002
LAMC1	1.63937
LANCL1	-2.86217
LAPTM5	-2.72992
LBC	-1.60497
LCP1	-2.04627
LDB2	-2.66798
LDLR	-1.81546
LEF1	1.98718
LHX2	2.56052
LILRA2	-2.69117
LILRB2	-2.09325
LILRB3	-2.38577
LIP1	2.10822
LIPA	-2.71258
LMO2	-2.1994
LMO7	-2.57569
LOC51027	-1.83017
LOC51053	1.76654
LOC51090	-1.85842
LOC51092	-1.97498
LOC51154	1.65845
LOC51267	-3.10789
LOC51285	-2.39643
LOC51297	-2.7686
LOC51673	-3.10885
LOC54103	-2.14118
LOC57803	-2.00432
LOC58511	-2.20527
LOC64174	-3.14458
LOC64182	-2.17049
LOC65243	2.28957
LOC81691	2.29322
LOXL2	1.96451
LPL	-3.89402
LRP8	2.72765
LTBP2	-2.18851
LTBP4	2.06773
LUM	-1.61677
MAD2L1	2.40285
MADH6	-1.67843
MAFF	-1.77578
MAGOH	1.98002
MAIL	-2.29867
MAN1A1	-1.6412
MAOA	-2.0826
MAOB	-1.81665
MAP1B	2.41802
MAP3K8	-2.47615
MAPK10	-1.63442
MAPK13	1.84271
MARCO	-2.22063
MBIP	-2.36486
MC1R	1.72586
MCAM	1.76391
MCM2	2.28323
MCM3	1.65825
MCM5	2.03331
MCM6	2.07248
MDDX28	1.588
MDS001	-1.96745
ME3	-1.65089
MEN1	-2.35834
MFAP4	-2.29352
MFNG	-1.89838
MGAT3	-1.65915
MGC10870	1.81877
MGC10981	2.19032
MGC11034	-1.77058
MGC12335	-2.15755
MGC14376	-2.10505
MGC16207	2.583
MGC2487	1.87485
MGC2668	1.70954
MGC2721	1.94334
MGC3040	-1.85351
MGC4707	1.64203
MGC5254	2.96748
MGC5350	1.77964
MGC5487	2.14912
MGC5585	1.78909
MGC5618	-1.82977
MGC5627	1.72195
MGC8407	1.59277
MGC861	3.10698
MGP	-1.67646
MME	-1.67169
MMP10	2.73423
MMP3	4.08802
MMP7	-1.88828
MMRN	-2.71782
MNDA	-2.45035
MPDU1	-1.72318
MPO	2.79021
MRC1	-5.33415
MRPL15	1.90958
MRPL36	2.02592
MRPL42	2.26615
MRPS12	1.93649
MS4A4A	-2.59752
MS4A6A	-2.85127
MS4A7	-2.84752
MSC	2.25251
MSLN	-2.74406
MSMB	-1.63172
MSP	-1.67577
MSTP031	-2.78729
MSTP032	-1.76448
MSTP043	-1.86915
MT1H	-1.95926
MTHFD2	1.70293
MUC1	-2.00044
MUC13	1.98238
MUC5AC	-1.79403
MUM2	-1.63859
MYBL2	4.25778
MYO5B	-1.70509
MYO6	-1.84649
MYO9B	-1.59809
MYOG	2.85368
NAP1	-3.40581
NCOR1	2.07198
NEFL	2.12542
NEK2	2.44774
NFKBIA	-1.59783
NG22	-1.66696
NGFB	1.83582
NIFK	1.61637
NME1	2.27147
NME2	1.69435
NMES1	-1.7943
NNMT	-2.04566
NOL1	1.6778
NOLA2	1.69892
NOP56	2.68031
NOTCH4	-1.59686
NPC2	-1.90523
NPY1R	2.00618
NR2F6	2.0986
NR4A1	-3.20723
NRGN	-2.92508
NTE	-2.08746
NTN4	-2.39729
NUDE1	1.86348
NUDT1	1.82331
NUF2R	3.12654
NUP155	2.01018
NYD-SP21	-2.31658
OAZ1	1.65086
ODZ2	1.82078
OLR1	-5.62535
ORC1L	1.7984
ORF1-FL49	-1.84572
OSF-2	2.23887
OTX2	2.16189
P37NB	2.12251
p40BBP	2.47154
P8	-1.64018
PAH	1.77412
PAI-RBP1	1.59825
PAPPA	1.62548
PAPSS2	-2.77387
PAX6	2.04102
PBX1	2.89803
PCDH20	-2.77063
PCDH7	2.55923
PCNA	2.37394
PCSK2	-1.72821
PDE4D	-1.62225
PDK4	-3.58755
PECAM1	-3.23447
PFKFB2	-1.70314
PFKP	1.63571
PFN2	2.58814
PGF	1.97446
PHGDH	1.73295
PIGA	-1.81872
PIGCP1	-2.16646
PIK3CA	1.75605
PILR(BETA)	2.16387
PIPOX	2.01478
PKMYT1	1.99828
PLA2G7	-2.98314
PLAU	1.80806
PLCG1	1.59985
PLK	3.28437
PLOD	1.58443
PLOD2	1.67506
PLP1	2.26732
PLXNB3	1.77312
PLXNC1	-1.63189
PNUTL2	-2.66162
POLD2	1.788
POLE	1.71171
POLR2D	1.82914
PON3	-2.3966
PP15	1.77968
PP591	2.05526
PPARG	-2.04288
PPP1R14C	-1.81974
PPP2R2C	1.72197
PPP3CB	2.90688
PRAME	3.72271
PRELP	-3.26922
PRIM1	2.26108
PRKAB2	1.7046
PRO0132	-1.91511
PRO0650	1.58638
PRO2000	2.54554
PRO2714	-1.79918
PRO2893	2.07622
PROS1	-1.83078
PRSS8	-1.71775
PSCDBP	-2.55552
PSG3	1.61107
PSMD11	1.62897
PSMD2	1.85038
PS-PLA1	-1.85102
PTGES	2.03335
PTGIS	-1.62292
PTGS2	-3.6373
PTHLH	1.92757
PTK9	1.73783
PTPN21	-1.63225
PTPRE	-1.96345
PTPRM	-1.79618
PTPRN	1.64013
PTPRO	-2.45592
PTTG1	2.96212
PVRL1	3.227
PYCS	1.68638
PYGM	-1.86538
RAB31	-1.76603
RAD23A	-2.13432
RAD23B	-1.85673
RAD51	2.6186
RAI3	-3.28754
RAMP	2.67817
RAMP2	-2.11732
RANBP1	1.62928
RANGAP1	1.73569
RARA	-2.6335
RARRES3	-1.98538
REG-IV	2.35968
RFC4	3.90842
RFX2	-1.61605
RGS1	-1.65494
RHBG	1.82046
RI58	-1.70005
RNASE1	-3.1058
RNASE6	-4.25103
RODH	-3.64595
RPS18	2.9195
RPS6KA2	-1.65822
RRAD	-2.18418
RRM1	1.90248
RRM2	3.23402
S100A12	-1.75322
S100A2	2.67815
SACS	1.99515
SAMSN1	-1.87507
SAST	-1.64292
SAT	-2.07769
SBBI42	-2.05468
SC65	1.62497
SCEL	-1.6604
SCNN1A	-1.72928
SCP2	-1.7104
SCYA13	-1.71597
SCYA14	-1.96647
SCYA18	-2.76827
SCYA23	-2.55937
SCYA3	-1.78595
SCYA4	-1.90112
SCYD1	-2.22902
SDCBP	-2.22243
SDCCAG3	1.65059
SDPR	-4.28937
SE57-1	-2.69826
SEC24C	2.17785
SERPINA1	-2.04733
SERPINA4	2.25977
SERPINA5	2.07282
SERPINA6	1.84572
SERPINA7	2.14563
SERPINB2	2.9466
SERPINB3	2.34065
SERPING1	-2.95833
SF3B3	2.1409
SFRS4	1.92306
SFTPA1	-3.70547
SFTPA2	-3.63744
SFTPB	-3.81065
SFTPC	-4.02936
SFTPD	-2.29208
SH3BGRL3	1.86598
SH3BP5	-1.80715
SH3D5	-1.58962
SHMT2	1.63946
SHOX2	1.71663
SIAT9	-2.47493
SIRT2	1.96285
SIX2	-2.42672
SLC11A1	-2.29958
SLC15A2	-1.8902
SLC16A1	3.472
SLC17A2	1.59775
SLC1A4	2.00014
SLC21A2	-3.46777
SLC21A9	-2.60945
SLC2A1	3.80586
SLC2A2	1.97784
SLC2A5	1.78552
SLC31A2	-2.153
SLC34A2	-4.57382
SLC4A4	-2.57923
SLC7A5	3.08675
SLC7A7	-3.18066
SLC9A3R1	2.20785
SLC9A3R2	-1.6383
SLIT1	1.68829
SLIT3	-2.41902
SLPI	-2.38258
SLUG	2.08977
SMARCB1	1.63117
SN	-2.4372
SNCG	2.00832
SNRPD1	1.70798
SOD3	-1.87369
SPINK5	-2.14974
SPOCK	2.359
SPP1	3.20328
SRCAP	-1.61612
SRCL	-2.5742
SRR	1.60235
STAG3	1.80172
STAM2	1.71095
STC2	2.64003
STEAP	1.65783
STK15	2.91728
STMN1	1.92046
STX11	-2.76237
SULT2A1	1.64803
TACC3	2.70032
TBXAS1	-2.06037
TCEB3	-1.74815
TCF2	-1.97066
TCF7	1.99162
TCFL1	1.65231
TEK	-2.24717
TF	2.32713
TFAP2C	2.10528
TGFBR2	-2.24745
TGM2	-1.77258
THBD	-2.49551
THY1	1.81805
TIE	-2.36834
TIMP2	-1.64595
TITF1	-3.37981
TK1	3.36826
TLE2	-1.79228
TLE4	1.68866
TLR2	-2.36074
TMPO	1.74991
TMPRSS2	-3.7973
TNA	-3.40795
TNFAIP3	-1.91878
TNFRSF5	-1.70591
TNFSF10	-1.94538
TNFSF12	-2.41808
TNFSF13	-2.30385
TNFSF13B	-1.87577
TNNI2	-1.88065
TNRC3	2.72287
TNXB	-2.76802
TOMM70A	1.72618
TOP2A	2.70459
TOPBP1	1.79874
TOPK	3.03289
TP63	2.375
TREM1	-3.48165
TREM2	-3.65511
TRIM28	1.61635
TRIM9	1.74265
TRIP	2.20023
TRIP13	3.43468
TRN2	1.92709
TROAP	3.60083
TRPC7	1.726
TSN	2.12548
TSNAX	2.62948
TTR	1.66645
TUBG1	1.6252
TXN	-1.69232
TYMS	2.19705
TYROBP	-3.44645
UBE2C	3.09328
UBE2D3	2.14605
UBE2V2	1.70387
UGB	-2.626
UGT2B4	1.71498
UGT2B7	2.26792
UMPK	2.82378
UMPS	2.18295
UNC13	-2.35006
UNG	2.29003
VDUP1	-2.2175
VIPR1	-3.19328
VPS45B	-1.81462
VRK1	1.73474
VRL	-1.8234
VSNL1	1.79502
VWF	-2.4239
WASF1	2.4529
WDR5	2.73922
WFDC2	-1.6046
WIF-1	-5.25335
WWP1	-2.31238
XLKD1	-3.0348
XRCC3	1.92729
YKT6	1.66795
Z39IG	-4.62891
ZIC2	2.09545
ZNF146	1.79102
ZNF261	-1.69165
ZNF36	2.48925
ZWINT	2.45349

## Sheet: human ESC-like module
Gene Symbol
AASS
ABCB7
ABCF2
ABHD9
ACACB
ACAD8
ACAT1
ACLY
ACTL6A
ACTN3
ACVR2B
ADCY2
ADFP
ADH5
ADNP2
ADSL
AGPAT7
AK3L1
AK3L2
AKR1B1
ALDH18A1
ALDH1B1
ALDH7A1
ALDOA
ALDOC
ALKBH7
AMOTL2
ANAPC1
ANAPC10
ANAPC4
ANAPC7
ANK2
ANKS6
ANP32E
AP1M2
AP2B1
APEH
APEX1
APOC1
APOH
APOO
APRT
ARHGEF16
ARHGEF9
ARID3B
ARL3
ASAM
ASCC3L1
ATP1B3
ATP5B
ATP5C1
ATP5G1
ATP5G2
ATP5G3
ATP5H
ATP5I
ATP5J
ATP5J2
ATP5O
ATP7B
ATPBD1C
ATPBD4
AURKA
AURKB
AURKC
AXIN2
AYTL2
AZIN1
B3GNT2
BAK1
BANF1
BARD1
BAX
BCAT1
BCKDK
BCOR
BEX1
BIK
BIRC5
BLM
BMP4
BMP7
BMPR1A
BNIP3
BST2
BTC
BTF3
BTF3L4
BUB1
BUB1B
BUB3
BXDC2
C10orf35
C11orf48
C12orf11
C12orf24
C12orf45
C14orf115
C14orf122
C14orf156
C16orf33
C16orf75
C17orf75
C19orf50
C1GALT1
C1orf106
C1orf108
C1orf121
C1orf172
C1orf77
C1QBP
C20orf27
C21orf105
C21orf33
C21orf45
C2orf31
C2orf47
C6orf108
C6orf115
C6orf148
C6orf211
C6orf85
C7orf43
C7orf44
C7orf48
C9orf123
C9orf140
CA14
CACHD1
CACNA2D2
CALB1
CALR
CALU
CAPG
CAPZA2
CARHSP1
CASP3
CBFB
CBR1
CBR3
CBS
CBX3
CCBL1
CCBL2
CCDC5
CCNA2
CCNB1
CCNB1IP1
CCNB2
CCNC
CCND1
CCND2
CCNE1
CCNF
CCS
CCT5
CD200
CD24
CD276
CD8A
CD9
CDC2
CDC20
CDC23
CDC25A
CDC25C
CDC34
CDC37
CDC6
CDC7
CDCA3
CDCA5
CDCA7
CDCA8
CDH1
CDH3
CDK4
CDK5
CDK6
CDK7
CDKN1C
CDKN3
CEBPZ
CENPA
CENPE
CENPF
CENPN
CENTD3
CETN3
CGN
CHAF1A
CHCHD1
CHCHD2
CHD6
CHEK1
CHEK2
CHST4
CKAP2
CKB
CKMT1B
CKS1B
CKS2
CLDN4
CLIC3
CLIP2
CLNS1A
CLPP
CLSPN
CMAS
CNIH4
CNKSR1
CNN2
CNOT7
CNTNAP2
COBL
COQ3
COX15
COX4NB
COX5B
COX6B1
COX7A2
COX7A2L
COX7B
COX7C
CPXM1
CRABP1
CRABP2
CRB3
CRISPLD1
CRMP1
CRSP2
CRY1
CSE1L
CSNK2A1
CSRP2
CTNNA1
CTNNBIP1
CTPS
CTSC
CXADR
CXCL6
CYB5B
CYC1
CYCS
CYFIP1
CYP19A1
CYP26A1
CYP2S1
DAP3
DARS
DARS2
DAZAP1
DBC1
DBF4
DBNDD1
DCC1
DCP2
DDX11
DDX18
DDX19B
DDX21
DDX25
DEK
DHCR7
DHRS13
DHX33
DHX9
DKC1
DKFZp762E1312
DLAT
DLG3
DLG7
DMKN
DNAJA2
DNAJB6
DNMT1
DNMT3A
DNMT3B
DOHH
DPEP3
DPP3
DPPA4
DPYSL2
DSG2
DSP
DTL
DTYMK
DUSP5
DUSP6
DYNC1H1
E2F1
E2F3
E2F5
EBNA1BP2
EBP
ECH1
ECHS1
EEF1E1
EEF2
EFTUD2
EHMT2
EIF1B
EIF2AK1
EIF2AK3
EIF2C1
EIF2C2
EIF2S2
EIF2S3
EIF3S10
EIF3S12
EIF3S2
EIF3S6
EIF3S6IP
EIF3S9
EIF4A1
EIF4B
EIF4E
EIF4EBP1
EIF4H
EIF5A
ELF3
ELOVL6
EMG1
ENO1
ENO2
ENSA
EPHA1
EPHB4
EPPB9
EPRS
ERBB2
ERBB3
ERCC6L
ERP29
ERRFI1
ETFA
ETV1
ETV4
ETV5
EXO1
EXOSC4
EXOSC5
EXOSC7
EXOSC8
EXOSC9
EXTL3
F2RL1
FABP5
FADD
FADS1
FADS2
FAM108B1
FAM117A
FAM136A
FAM33A
FAM46B
FAM60A
FAM83D
FAM83H
FAM96A
FARSA
FARSB
FAU
FBL
FBXL10
FDPS
FDXR
FECH
FGD1
FGF13
FGF2
FGFR1
FGFR2
FGFR4
FH
FJX1
FKBP10
FKBP3
FKBP4
FLAD1
FLJ11184
FLJ20674
FLJ22662
FNBP1L
FOXA1
FOXA3
FOXH1
FOXM1
FRAT2
FSD1
FTSJ1
FUBP1
FUS
FUSIP1
FVT1
FZD5
FZD7
FZD8
G3BP1
G3BP2
GABARAPL1
GABRA1
GABRB1
GABRB3
GALNT12
GARNL4
GARS
GART
GCHFR
GDF3
GEMIN6
GEMIN7
GFPT1
GFPT2
GGTLA1
GINS2
GINS4
GJA1
GJA7
GLA
GLDC
GLO1
GLT1D1
GMNN
GMPR2
GNA14
GNL3
GNPDA1
GOT2
GPC4
GPI
GPM6B
GPR160
GPR176
GPR19
GPX1
GRAMD1A
GRB7
GRHPR
GRPR
GRSF1
GRTP1
GSPT2
GSTO1
GSTP1
GTF2E1
GTF2H2
GTF3C2
GTSE1
GUCA1A
GYG2
H2AFZ
HADH
HAS2
HAT1
HDAC1
HDPY-30
HELLS
HERC5
HEY2
HIC2
HINT1
HIP2
HIST1H2AD
HIST1H4J
HK1
HLTF
HMG4L
HMGA1
HMGB2
HMGB3
HMGCR
HMGN4
HMMR
HN1
HN1L
HNRNPA1
HNRNPC
HNRPA2B1
HNRPAB
HNRPH2
HNRPK
HNRPL
HNRPR
HPS3
HRASLS3
HRSP12
HSBP1
HSD11B2
HSD17B10
HSPA14
HSPA2
HSPA9
HSPC111
HSPE1
IARS
IARS2
ICMT
ID1
ID3
IDH3G
IFITM1
IGSF3
ILF2
ILF3
IMP3
IMPA2
IMPAD1
IMPDH2
IPO9
ISG20L1
ISX
ITGA3
ITGB1BP3
ITGB4BP
ITM2C
IVNS1ABP
JARID1B
JARID2
JMJD2A
KATNB1
KCNK1
KCNN2
KCNS3
KDR
KEAP1
KHDRBS1
KIAA0020
KIAA0528
KIAA1147
KIAA1166
KIAA1522
KIF11
KIF14
KIF18A
KIF20A
KIF22
KIF23
KIF2A
KIF2C
KIF4A
KIF5C
KIFC1
KLK8
KPNA2
KPNA6
KRAS
KRT18
KRT19
KRT5
KRT8
KRTCAP3
L1TD1
LAGE3
LAPTM4B
LARP4
LARS
LBH
LCK
LCMT1
LDHB
LEFTY1
LEFTY2
LEPREL2
LIG3
LIN28
LITAF
LMNB1
LMNB2
LONP1
LOXL2
LPHN2
LRIG1
LRP4
LRP8
LRRC8A
LRRN1
LSM10
LSM2
LSM4
LSM5
LSM6
LSM7
LTA4H
LY9
LYPLA1
LYPLA2
LYRM4
M6PR
MAD2L1
MAGED4B
MAL2
MAP2K1
MAPK1
MAPK13
MAPK14
MAPRE1
MARS
MASTL
MAZ
MBL2
MBOAT5
MCM2
MCM3
MCM4
MCM5
MCM6
MCM7
MCTS1
MDH1
MDH2
ME2
MEIS1
METTL9
MFAP2
MGC4172
MGC5370
MID1
MID1IP1
MKI67IP
MLF1IP
MNAT1
MND1
MON1B
MOSC1
MPHOSPH1
MPP6
MRPL11
MRPL12
MRPL13
MRPL14
MRPL15
MRPL16
MRPL2
MRPL22
MRPL23
MRPL37
MRPL39
MRPL4
MRPS12
MRPS16
MRPS17
MRPS18B
MRPS2
MRPS21
MRPS23
MRPS24
MRPS26
MRPS27
MRPS28
MRPS30
MRPS34
MRPS35
MRPS36
MRPS7
MRS2L
MRTO4
MSH2
MT1F
MT1H
MT1X
MTF2
MTHFD1
MTHFD1L
MTHFD2
MTIF2
MTL5
MVD
MVP
MYBL2
MYC
MYCL1
MYH10
MYO10
MYST2
N4BP2
NANOG
NAP1L1
NAP1L2
NAP1L3
NARS
NASP
NBPF15
NCAPD2
NCAPG
NCAPG2
NCAPH
NCBP2
NCL
NDC80
NDUFA11
NDUFA13
NDUFA2
NDUFA3
NDUFA4
NDUFA7
NDUFA9
NDUFAB1
NDUFB1
NDUFB10
NDUFB11
NDUFB2
NDUFB7
NDUFB8
NDUFS2
NDUFS4
NDUFS8
NDUFV2
NEBL
NEDD9
NEK2
NEK3
NEK4
NEK6
NES
NFE2L3
NGFRAP1
NIF3L1
NIP7
NIPSNAP1
NLE1
NLGN4X
NLN
NLRP2
NMB
NME1
NME2
NME4
NOL1
NOL11
NOLA2
NOLA3
NONO
NOTCH3
NP
NPM1
NPY5R
NQO1
NQO2
NR2F6
NR3C1
NRAS
NSBP1
NSDHL
NT5DC2
NTHL1
NTS
NUDCD2
NUDT1
NUDT15
NUDT21
NUP107
NUP155
NUP54
NUSAP1
NXN
OCIAD2
OGDHL
OLFM1
OPA1
ORC1L
ORC3L
OTUB1
OTX2
OXA1L
P15RS
P4HB
PA2G4
PABPC1
PAK1
PALM2
PAPSS2
PARD6G
PARP1
PBX1
PCBP1
PCDH1
PCDHB2
PCNA
PCTK1
PDCD2
PDE9A
PDHA1
PDHB
PDIA4
PDK1
PDPN
PDZD4
PECR
PELI1
PFN1
PGD
PHACTR1
PHB
PHC1
PHF17
PHF20
PHF5A
PHLPP
PIH1D1
PIK3CB
PIM1
PIM2
PIN4
PIPOX
PIR
PKIB
PLCXD1
PLD2
PLK1
PLK4
PLP1
PLS3
PMAIP1
PMPCA
PMS1
PNPT1
PNRC2
PODXL
POLD1
POLD2
POLE2
POLG2
POLQ
POLR2E
POLR2F
POLR2H
POLR2I
POLR3A
POLR3E
POLR3G
POLR3K
POLRMT
POP7
POSTN
POU5F1
PPAT
PPIF
PPIH
PPM1G
PPP1CA
PPP1CC
PPP1R16B
PPP2R1A
PPP2R1B
PPP4C
PPT2
PQBP1
PRDX1
PRDX2
PRDX3
PRDX5
PRICKLE1
PRIM1
PRIM2
PRKAR2B
PRKCI
PRKDC
PRMT1
PRMT2
PRMT3
PROM1
PRPS1
PSMA2
PSMA5
PSMA7
PSMB5
PSMB6
PSMB8
PSMC3
PSMD1
PSMD14
PSMD2
PSMD3
PSMD8
PSME3
PSRC1
PTBP1
PTK7
PTMA
PTMS
PTPRF
PTPRU
PTTG1
PUNC
PUS1
PUS7
PVRL2
PXDN
PYCARD
RAB17
RAB34
RAB38
RAB3A
RAB3B
RAB5A
RACGAP1
RAD18
RAD23B
RAD54B
RALA
RALY
RASGEF1A
RASL11B
RBM14
RBM28
RBM35A
RBMX
RBPMS2
RCAN1
RCC1
RCC2
RCE1
RCN2
RDBP
REPIN1
RFC2
RFC3
RFC4
RHPN2
RNASEH2A
RNF113A
RNPS1
RP1-55C23.6
RP6-213H19.1
RPA2
RPA3
RPL10A
RPL10L
RPL11
RPL13
RPL15
RPL18
RPL22
RPL23
RPL27A
RPL29
RPL30
RPL31
RPL39L
RPL5
RPL6
RPL7A
RPLP0
RPN2
RPP25
RPP40
RPS10
RPS12
RPS13
RPS15A
RPS16
RPS19
RPS20
RPS21
RPS23
RPS24
RPS27
RPS27L
RPS3
RPS5
RPS6
RPS6KA1
RPS7P1
RPS8
RPSA
RPUSD1
RRAS2
RRM1
RRM2
RRM2B
RRP9
RUVBL1
RUVBL2
RYBP
S100A11
SALL1
SALL2
SARDH
SARS
SART3
SC4MOL
SC5DL
SCG3
SCG5
SCGB3A2
SCNN1A
SCO1
SCOTIN
SDHB
SDHC
SDHD
SEC61G
SECISBP2
SEMA3A
SEMA4C
SEMA6A
SENP3
SEPHS1
SEPHS2
SEPT3
SERBP1
SERPINH1
SESN2
SET
SF3A3
SF3B14
SF3B4
SF3B5
SHC1
SIKE
SILV
SIP1
SIRT1
SKP2
SLC16A1
SLC25A1
SLC25A11
SLC25A4
SLC25A40
SLC25A5
SLC25A6
SLC29A1
SLC29A2
SLC29A4
SLC2A1
SLC2A3
SLC36A4
SLC38A1
SLC39A10
SLC39A8
SLC3A2
SLC44A1
SMARCC1
SMARCD1
SMC2
SMC4
SMNDC1
SMPDL3B
SMS
SNAPC2
SNORD22
SNRPA
SNRPA1
SNRPB
SNRPB2
SNRPC
SNRPD1
SNRPE
SNRPF
SNRPN
SNX15
SNX5
SORL1
SOX2
SOX3
SPAG5
SPINT1
SPRED1
SPRY1
SPRY2
SPRY4
SPSB2
SQLE
SRP68
SRP72
SS18
SS18L2
SSB
SSRP1
ST18
ST6GALNAC4
STAG2
STAR
STAT1
STC1
STC2
STIP1
STOML2
STS-1
STX3
SUB1
SUCLA2
SUDS3
SUGT1
SUMO1
SUPT4H1
SURF1
SURF5
SYNCRIP
SYNGR3
TACSTD1
TAF12
TAF15
TAF6
TAF9B
TALDO1
TARS2
TBCD
TBCE
TBL1XR1
TCF19
TCF7L1
TCOF1
TEAD2
TEAD4
TERF1
TERT
TFAM
TFAP2C
TFB1M
TGIF1
TGIF2
THAP11
THEM2
THOC3
THOP1
THY1
THYN1
TIAM1
TIMM10
TIMM13
TIMM17B
TIMM23
TIMM44
TIMM8A
TIMM8B
TMEFF1
TMEM169
TMEM183A
TMEM2
TMEM98
TMSL8
TNFRSF11B
TNFRSF12A
TNFRSF8
TNKS1BP1
TNNI3
TNNT1
TNPO1
TOMM22
TOMM7
TOP1
TOP2A
TOX3
TP53
TP53I3
TP53RK
TPD52
TPX2
TRAF4
TRAIP
TRAPPC4
TRFP
TRIP13
TRIP6
TRUB2
TSN
TSPAN13
TTC9
TTF2
TTK
TTYH3
TUBA4A
TUBB
TUBB2A
TUBG1
TXNL2
TXNL4A
TXNRD1
U2AF1
UBA52
UBE2C
UBE2G1
UBE2V2
UCHL1
UCK2
UCP2
UGDH
UGP2
UGT1A10
UMPS
UNC13A
UNC13B
UNC5B
UQCR
UQCRC1
UQCRC2
UQCRFS1
UQCRH
USP4
USP44
USP9X
UTP18
VARS
VASH2
VASP
VBP1
VCAN
VPS25
VRK1
VSNL1
WARS
WBP11
WDHD1
WDR12
WDR18
WDR57
WDR77
WEE1
WRN
XPO1
XPO7
XPOT
XRCC5
XRN2
YAP1
YARS2
YEATS4
YIPF6
YWHAG
YWHAH
YY1
ZBTB3
ZCD1
ZDHHC18
ZIC2
ZIC3
ZMAT4
ZNF195
ZNF217
ZNF22
ZNF232
ZNF281
ZNF354C
ZNF394
ZNF473
ZNF516
ZNF553
ZNF589
ZNF593
ZNF653
ZNF697
ZNF711
ZNHIT3
ZW10
ZWINT

## Sheet: human ESC consensus module
Gene Symbol
ALPL
BUB1B
CASP3
CDC2
EPHA1
ERBB2
FGF2
FGFR1
GAD1
GJA1
HELLS
ILF3
INDO
JARID2
OAZ2
ORC1L
PAK1
PMAIP1
EXOSC9
PPM1B
PPP2R1B
PTPN2
SALL1
SCNN1A
SFRP1
SFRP2
SFRS7
SNRPA
SNRPN
SOX2
TDGF1
TIA1
ZIC2
ZIC3
FZD7
PPAP2A
HESX1
BUB3
DDX21
CER1
NFE2L3
TRIM22
POLR3G
LEFTY1
NMU
KIF2C
CHEK2
OIP5
FRAT2
CBX5
RAD54B
FOXD3
PIPOX
EPB41L4B
DPPA4
C14orf115
EXOSC5
SEMA6A
LRRN1
PRDM14
DCC1
LIN28
NANOG
PHF17
TCF7L1
USP44
EGLN3
trash
ACTA1
ACTC1
ACTN3
ADD2
PARP1
AMD1
BIRC5
ATP1A2
BMPR1A
BUB1
C1QBP
CBS
CCNA2
CCNB1
CD24
CDC6
CDC20
CDC25A
CTSC
CHEK1
CRABP1
CRABP2
CRMP1
CSE1L
CXADR
CYP26A1
COCH
DHFR
DIAPH2
DLG3
DNA2L
DNMT3A
DNMT3B
DSG2
ECT2
SLC29A1
EPRS
ETV1
ETV4
FABP5
FEN1
GPC4
FGF13
FKBP5
FOXO1
GABRA5
GABRB3
GART
GLDC
GPM6B
GPR19
MSH6
HAS3
HMGB3
HMGA1
HMMR
HNRPAB
HSPA4
HSPA8
HSPD1
ITPR3
KAL1
KCNS3
KIF5C
KLKB1
KPNA2
KRT8
LCK
LGALS8
TACSTD1
M6PR
MAN2A1
MARS
MAT2A
MCM2
MCM3
MCM4
MCM5
MCM6
MCM7
MFGE8
MGST1
MICB
MRE11A
MSH2
NUDT1
MTHFD1
NASP
NFYB
NODAL
NPM1
NTHL1
NTS
PCDH1
PDCD2
PDK1
PFAS
PIK3CB
PLCB3
PNN
PODXL
POLE2
POU5F1
PPP2R2B
PRIM1
PRIM2
PRKX
PRPS1
PTPRZ1
RAB3B
RARRES2
RBBP8
RFC3
RFC4
ABCE1
ROBO1
RPS24
RRM2
SALL2
SFRS1
ST6GAL1
SLC6A8
SLC16A1
SMS
SORL1
SSB
TEAD4
TERF1
TFAM
TMPO
TNNT1
UGP2
UNG
VSNL1
ZNF195
LRP8
FZD5
DEK
FXR1
USP9X
UTF1
IFITM1
TMEFF1
RUVBL1
USO1
ADAM23
TRIM24
PROM1
FUBP1
DDX18
MAP7
CLDN6
SYNGR3
DCLK1
AURKB
NOLC1
PTTG1
MED14
HOMER1
C1orf38
GDF3
DLG7
G3BP2
RABGAP1L
SRA1
CHAF1A
DNAJB6
AP1M2
G3BP1
GPR64
CEBPZ
AASS
PRMT3
ZNF267
NPM3
TUBB2C
LYPLA1
OLFM1
MAD2L2
NOL5A
PAICS
PAICS
RAD51AP1
IGF2BP3
IGF2BP2
MTHFD2
PIM2
NUDT21
LECT1
DIDO1
MYST2
HRASLS3
PSIP1
WDHD1
GPR176
RRAS2
MTF2
SEPHS1
GARNL4
TTLL12
PASK
MDN1
COBL
BOP1
NCAPH
SIRT1
TNPO3
PRKD3
KIF4A
NOL11
SFRS18
LRIG1
CNTNAP2
AUTS2
SERBP1
PITPNC1
GNL3
ITGB1BP3
C6orf66
CYP2S1
PYCR2
RRP15
GMNN
GAL
FAM108B1
ZNF589
RNF138
HSPC111
LARP7
ESF1
AZIN1
LSR
GINS2
GPRC5B
CECR1
BRWD1
C21orf45
FAM64A
PUS7
L1TD1
ERCC6L
RBM35A
NCAPG2
ZNF770
PAK1IP1
C12orf48
FANCL
NUDT15
BXDC2
C14orf106
LGR4
MCM10
PRPF40A
TMEM48
C12orf11
CCAR1
WDR12
RCC2
KLHL7
CHST7
NUP107
SALL4
SLC39A10
MRS2L
SPC25
NLN
NLGN4X
MTA3
ZNF398
CACHD1
FAM60A
NOC3L
ISG20L1
SLC13A3
CAPRIN2
DBNDD1
CAMKV
NUP37
ELOVL6
GNPTAB
C1orf108
NARG2
NARG1
MYO19
PUS1
TMEM177
SLC38A1
TXNDC1
WBSCR16
CDT1
SPRY4
BCL2L12
GINS4
HPS3
RBM13
SLC7A3
ZSCAN10
ANGEL2
KIFC2
LOC91431
C20orf72
DMKN
CDCA5
MAL2
FAM46B
SCGB3A2
GYLTL1B
LOC157627
C8orf42
C11orf82
ARL5B
TUBB2B
CKMT1A

## Sheet: SOX2 targets in human ESCs
Gene Symbol	Expression UP or DOWN in human ESCs (vs diff.)
ADD3	DOWN in hESCs
ADRBK2	UP in hESCs
AK3	UP in hESCs
ALDH7A1	UP in hESCs
ALPL	UP in hESCs
ANKRD1	DOWN in hESCs
ANP32A	UP in hESCs
AP2A1	DOWN in hESCs
APEX1	UP in hESCs
APPBP1	UP in hESCs
ARF3	UP in hESCs
ARF4L	DOWN in hESCs
ARFGEF1	UP in hESCs
ARHGEF17	DOWN in hESCs
ARNTL2	UP in hESCs
ATBF1	DOWN in hESCs
ATF3	DOWN in hESCs
AXL	DOWN in hESCs
BAMBI	DOWN in hESCs
BAX	UP in hESCs
BCAT1	UP in hESCs
BCL9	UP in hESCs
BDH	UP in hESCs
BMP5	DOWN in hESCs
BMP7	UP in hESCs
BMPR2	DOWN in hESCs
BTG1	DOWN in hESCs
BUB1B	UP in hESCs
BUB3	UP in hESCs
C10orf117	UP in hESCs
C10orf70	UP in hESCs
C12orf14	UP in hESCs
C13orf7	UP in hESCs
C14orf115	UP in hESCs
C14orf43	DOWN in hESCs
C15orf20	UP in hESCs
C1orf21	UP in hESCs
C5orf4	DOWN in hESCs
C6orf111	UP in hESCs
C7orf16	UP in hESCs
C9orf76	UP in hESCs
CA14	UP in hESCs
CA4	DOWN in hESCs
CASP3	UP in hESCs
CBX3	UP in hESCs
CBX5	UP in hESCs
CCL2	DOWN in hESCs
CCND1	UP in hESCs
CD99L2	DOWN in hESCs
CDC14B	UP in hESCs
CDC2	UP in hESCs
CDC42EP5	DOWN in hESCs
CDC45L	UP in hESCs
CDC7	UP in hESCs
CDH2	UP in hESCs
CDH3	UP in hESCs
CDW92	UP in hESCs
CDYL	UP in hESCs
CENPE	UP in hESCs
CER1	UP in hESCs
CHEK2	UP in hESCs
CHES1	UP in hESCs
CHST6	UP in hESCs
CLIC4	UP in hESCs
CNOT2	UP in hESCs
COL12A1	DOWN in hESCs
COL21A1	DOWN in hESCs
COPB	UP in hESCs
CPS1	DOWN in hESCs
CRIM1	DOWN in hESCs
CSGlcA-T	DOWN in hESCs
CTGF	DOWN in hESCs
CTH	UP in hESCs
CXCL5	UP in hESCs
CYB5R2	UP in hESCs
CYP1A1	DOWN in hESCs
CYR61	DOWN in hESCs
DATF1	UP in hESCs
DCC1	UP in hESCs
DDX21	UP in hESCs
DHFRL1	UP in hESCs
DKK1	DOWN in hESCs
DLL1	DOWN in hESCs
DPP3	UP in hESCs
DPPA4	UP in hESCs
DPYSL2	UP in hESCs
DPYSL3	UP in hESCs
DTNA	UP in hESCs
DUSP6	UP in hESCs
E2F3	UP in hESCs
E2F5	UP in hESCs
EAF2	UP in hESCs
EFEMP2	DOWN in hESCs
EGFL4	UP in hESCs
EGLN3	UP in hESCs
EIF2C2	UP in hESCs
ENPP2	DOWN in hESCs
ENSA	UP in hESCs
EOMES	UP in hESCs
EPB41L4B	UP in hESCs
EPHA1	UP in hESCs
EPM2AIP1	DOWN in hESCs
ERBB2	UP in hESCs
EXOSC5	UP in hESCs
EXOSC9	UP in hESCs
FAM33A	UP in hESCs
FEZ1	UP in hESCs
FGF2	UP in hESCs
FGFR1	UP in hESCs
FGFR2	DOWN in hESCs
FKBP14	DOWN in hESCs
FKBP7	DOWN in hESCs
FLJ10006	UP in hESCs
FLJ10514	UP in hESCs
FLJ10884	UP in hESCs
FLJ10970	DOWN in hESCs
FLJ11301	UP in hESCs
FLJ12439	UP in hESCs
FLJ12666	UP in hESCs
FLJ16517	UP in hESCs
FLJ20516	UP in hESCs
FLJ20582	UP in hESCs
FLJ21616	DOWN in hESCs
FLJ22471	DOWN in hESCs
FLJ25801	UP in hESCs
FLJ30707	UP in hESCs
FLJ32499	DOWN in hESCs
FMO4	DOWN in hESCs
FOXD3	UP in hESCs
FOXO1A	UP in hESCs
FOXP1	DOWN in hESCs
FRAT2	UP in hESCs
FUS	UP in hESCs
FUT1	UP in hESCs
FZD1	DOWN in hESCs
FZD10	DOWN in hESCs
FZD7	UP in hESCs
G3BP	UP in hESCs
GABARAP	DOWN in hESCs
GAD1	UP in hESCs
GALNT3	UP in hESCs
GBF1	DOWN in hESCs
GCNT2	UP in hESCs
GJA1	UP in hESCs
GLI3	DOWN in hESCs
GNA13	UP in hESCs
GPC6	UP in hESCs
H2AFJ	DOWN in hESCs
H2AFX	UP in hESCs
HAND1	DOWN in hESCs
HBG1	DOWN in hESCs
HBG2	DOWN in hESCs
HDAC2	UP in hESCs
HDCMA18P	UP in hESCs
HELLS	UP in hESCs
HESX1	UP in hESCs
HIST1H2BG	UP in hESCs
HIST1H2BK	DOWN in hESCs
HIST2H4	UP in hESCs
HN1	UP in hESCs
HNRPA1	UP in hESCs
HNRPL	UP in hESCs
HOP	DOWN in hESCs
HOXA1	UP in hESCs
HOXC4	DOWN in hESCs
HSPC138	UP in hESCs
HSPCB	UP in hESCs
ICMT	UP in hESCs
ID1	UP in hESCs
IFI16	DOWN in hESCs
IGFBP2	UP in hESCs
ILF3	UP in hESCs
IMP-1	UP in hESCs
IMP-3	UP in hESCs
INDO	UP in hESCs
INHBA	DOWN in hESCs
INM01	UP in hESCs
IRX2	UP in hESCs
ISL1	DOWN in hESCs
JARID2	UP in hESCs
KCNN2	UP in hESCs
KDR	DOWN in hESCs
KIAA0738	DOWN in hESCs
KIAA1287	UP in hESCs
KIAA1505	DOWN in hESCs
KIAA1573	UP in hESCs
KIF11	UP in hESCs
KIF13A	UP in hESCs
KIF23	UP in hESCs
KIF2C	UP in hESCs
KLF5	DOWN in hESCs
KLHL13	UP in hESCs
KNTC1	UP in hESCs
LEFTY1	UP in hESCs
LEFTY2	UP in hESCs
LHX2	DOWN in hESCs
LIAS	UP in hESCs
LIN28	UP in hESCs
LOC349136	DOWN in hESCs
LOC92162	DOWN in hESCs
LOH11CR2A	DOWN in hESCs
LOXL2	DOWN in hESCs
LRP2	DOWN in hESCs
LRRN1	UP in hESCs
M96	UP in hESCs
MAB21L1	DOWN in hESCs
MAGED2	DOWN in hESCs
MAT2B	UP in hESCs
MEIS1	DOWN in hESCs
MGC14376	DOWN in hESCs
MGC14798	UP in hESCs
MGC40168	UP in hESCs
MGC4170	UP in hESCs
MGC51082	DOWN in hESCs
MGEA5	UP in hESCs
MRPL15	UP in hESCs
MTSS1	DOWN in hESCs
NAALAD2	DOWN in hESCs
NANOG	UP in hESCs
NEDD9	DOWN in hESCs
NELL1	DOWN in hESCs
NFE2L3	UP in hESCs
NMU	UP in hESCs
NP	UP in hESCs
NR6A1	UP in hESCs
NUCKS	UP in hESCs
NUP160	UP in hESCs
NUSAP1	UP in hESCs
OAZ2	UP in hESCs
OIP5	UP in hESCs
OLFML3	UP in hESCs
ORC1L	UP in hESCs
PAK1	UP in hESCs
PCDH17	DOWN in hESCs
PCGF4	DOWN in hESCs
PCOLCE	DOWN in hESCs
PCSK5	DOWN in hESCs
PCYT1B	UP in hESCs
PDZK4	UP in hESCs
PEO1	UP in hESCs
PHF17	UP in hESCs
PIG8	UP in hESCs
PIPOX	UP in hESCs
PIR	UP in hESCs
PLEKHA4	DOWN in hESCs
PLEKHA8	UP in hESCs
PMAIP1	UP in hESCs
POLR3E	UP in hESCs
POLR3G	UP in hESCs
POU2F1	UP in hESCs
PPAP2A	UP in hESCs
PPAT	UP in hESCs
PPM1B	UP in hESCs
PPP2R1B	UP in hESCs
PPP2R3A	DOWN in hESCs
PRDM14	UP in hESCs
PRDX1	UP in hESCs
PRKAR2B	UP in hESCs
PRNP	DOWN in hESCs
ProSAPiP1	UP in hESCs
PRSS8	UP in hESCs
PTN	DOWN in hESCs
PTPN2	UP in hESCs
PVRL1	UP in hESCs
PWP1	UP in hESCs
RAD54B	UP in hESCs
RASL11B	UP in hESCs
REST	UP in hESCs
RGC32	DOWN in hESCs
RGS4	DOWN in hESCs
RIF1	UP in hESCs
RNPC2	UP in hESCs
ROR1	UP in hESCs
RPL17	UP in hESCs
RPL7	UP in hESCs
RPL9	UP in hESCs
RPLP1	UP in hESCs
RPS18	UP in hESCs
RPS3A	UP in hESCs
RRAGD	UP in hESCs
RRAS	DOWN in hESCs
RRS1	UP in hESCs
SALL1	UP in hESCs
SAT	DOWN in hESCs
SC5DL	UP in hESCs
SCG3	UP in hESCs
SCNN1A	UP in hESCs
SDCCAG33	DOWN in hESCs
SEC10L1	UP in hESCs
SEMA3A	UP in hESCs
SEMA6A	UP in hESCs
SERPINA1	DOWN in hESCs
SET	UP in hESCs
SFRP1	UP in hESCs
SFRP2	UP in hESCs
SFRS7	UP in hESCs
SHREW1	UP in hESCs
SKIL	UP in hESCs
SLC24A3	DOWN in hESCs
SLC39A1	UP in hESCs
SLC3A2	UP in hESCs
SLC7A5	DOWN in hESCs
SLC7A7	DOWN in hESCs
SMAD3	DOWN in hESCs
SMARCA3	UP in hESCs
SNRPA	UP in hESCs
SNRPD3	UP in hESCs
SNRPN	UP in hESCs
SOS2	DOWN in hESCs
SOX2	UP in hESCs
SS18L2	UP in hESCs
SSR4	DOWN in hESCs
STC1	UP in hESCs
SULF1	DOWN in hESCs
TALDO1	UP in hESCs
TCF7L1	UP in hESCs
TDGF1	UP in hESCs
TFAP2C	UP in hESCs
THBS3	DOWN in hESCs
TIA1	UP in hESCs
TIF1	UP in hESCs
TIMP4	UP in hESCs
TOP2A	UP in hESCs
TPM3	UP in hESCs
TRIM16	DOWN in hESCs
TRIM22	UP in hESCs
TRIM5	DOWN in hESCs
TSGA14	DOWN in hESCs
TTF2	UP in hESCs
TUBB	UP in hESCs
UBE2C	UP in hESCs
UGT8	UP in hESCs
USP44	UP in hESCs
VDP	UP in hESCs
VIM	DOWN in hESCs
WBP11	UP in hESCs
ZADH2	DOWN in hESCs
ZFP36L1	DOWN in hESCs
ZIC1	DOWN in hESCs
ZIC2	UP in hESCs
ZIC3	UP in hESCs
ZNF281	UP in hESCs
ZNF300	UP in hESCs
ZNF331	UP in hESCs
ZNF342	UP in hESCs

## Sheet: c-Myc targets
Gene Symbol
ABCC3
ACAD10
ACADM
ACHE
ACO2
ACOX1
ACPP
ACSS2
ACTG1
ADAM8
AEBP1
AGPAT5
AHNAK
AHSG
AKAP1
AKAP12
AKR1A1
ALDH1B1
ALDH2
ALG3
ALS2CL
AMD1
AMPD3
ANAPC1
ANGEL1
APC
APEX1
APP
ARF1
ARF4
ARNTL
ARNTL2
ASCL2
ATF4
ATIC
ATP1A2
ATP2B4
BAX
BBC3
BCL2
BCL3
BCS1L
BID
BOP1 /// LOC653119
BRCA2
BSG
C11ORF48
C16ORF14
C16ORF74
C17ORF27
C19ORF48
C1ORF107
C1ORF33
C1ORF51
C20ORF27
CAD
CASP8
CASP9
CCDC78
CCDC86
CCKBR
CCNA2
CCND2
CCNE1
CCNG2
CD63
CD79B
CDCA8
CDK2
CDK4
CDKN1A
CDKN2B
CEACAM5
CEBPA
CFDP1
CFLAR
CGN
CHRNB1
CIRH1A
CLCN6
CLDN1
CLNS1A /// C3ORF4
COL1A1
COL4A1
COL4A2
COL5A1
COL8A2
CR2
CST5
CSTB
CTSF
CXCL2
DAB2
DCK
DDAH2
DDX10
DDX18
DDX26B
DDX28
DGKA
DHODH
DHRS1
DKC1
DPH1 /// OVCA2
DUOX1
DUSP1
DUSP2
DUSP22
E2F1
EIF4A1
EIF4E
EIF5A2
ELK1
EMP1
ENO1
EPB42
EPHX1
EPS8L1
ERBB3
ERCC1
ETS2
EXOSC5
FAM100A
FAM86C
FAM86C /// FAM86B1 /
FARP1
FARSLA
FARSLB
FASLG
FASN
FCHSD1
FECH
FGF11
FGFBP1
FGFR4
FKBP4
FLAD1
FLJ10404
FLJ10661
FLJ12684
FLJ32549
FLJ42957
FLNB
FN1
FOXM1
FPGS
FUT1
FXN
GADD45A
GAL
GALT
GEMIN5
GNL3
GOLGA2
GPATC4
GPD1L
GPR110
GPR4
GPRC5A
GSK3B
GSTP1
HERPUD1
HIF1A
HIST1H2AC
HK2
HMBS
HMGN2
HMOX1
HNRPA1
HNRPA2B1
HNRPDL
HOXD13
HS6ST2
HSD11B2
HSP90AA2
HSPA1A /// HSPA1B
HSPA4
HSPA6
HSPA6 /// LOC652878
HSPA8
HSPC111
HSPD1
HSPE1
ICAM1
ID2
ID2 /// ID2B
ID3
IFRD2
IL11RA
IL13
IL2
IMP4
IMPA2
INSM1
INSR
IPO4
IRF2
IRF3
ISG20
ISGF3G
ITGA6
ITGB1
JTV1
JUN
JUNB
KIAA0280
KIAA0323
KIAA1553
KIAA1609
KRTAP2-1
LAMC2
LBR
LDHA
LMNA
LOC201164
LOC646762
LSG1
LTB
LTBP2
MAGEA3
MAN2A2
MAP3K6
MCL1
MCM7
MCOLN2
MDM2
MEG3
MEN1
MET
METTL1
MGC16597
MGC2408
MGST1
MICAL1
MIRN21
MKNK1
MON1A
MPO
MSN
MST1R
MTMR11
MUC1
MYBBP1A
MYBL2
MYC
NAB2
NALP1
NBN
NCL
NDE1
NEF3
NFKB2
NGFR
NIT1
NLE1
NME1
NME2
NOL1
NOL5A
NOL6
NOLC1
NPM1
NRAS
NRP1
NTF5
NTHL1
NTN2L
NUFIP1
OCA2
ODC1
OR2A4
OSBP2
PA2G4
PAICS
PC
PCOLCE2
PCYOX1L
PDHA1
PDLIM7
PEO1
PER1
PES1
PEX3
PFKM
PHB
PHF1
PI3
PKP1
PLA2G4A
PLAU
PLEC1
PLEKHG2
PMM2
PMS2L11
PNPT1
POLB
POLD2
PPAT
PPID
PPM2C
PPP1R7
PRKDC
PRR5
PRTN3
PSCD2
PSMB1
PTEN
PTMA
PTMA /// LOC440085 /
PTRH2
QDPR
RABEPK
RABGAP1L
RARA
RBM3
RCC1
RCL1
RHBDF1
RNASEH2A
RNU3IP2
RPL13A
RPL13A /// LOC283340
RPL19
RPL22
RPL23
RPL27A /// LOC389435
RPL3
RPL6
RPP40
RPS15A
RPS6
RUNX1
SAT1
SCFD2
SERPINB1
SERPINE1
SESTD1
SFXN4
SIM2
SLBP
SLC12A8
SLC19A1
SLC29A2
SLC2A4
SLC4A2
SLC6A15
SLC6A8
SLC9A3R2
SLITRK6
SMTN
SMURF1
SORD
SORL1
SPTAN1
SPTB
SRD5A1
SRM
SSH3
STAT6
STMN1
STMN3
STX5
SUPV3L1
SYNGR2
TAF4B
TCF12
TCIRG1
TCOF1
TERT
TFB2M
TFRC
TGFB1
TGFB2
TGFB3
TGFBR1
TGM1
TGM2
THBS1
THRA /// NR1D1
TINF2
TMEM49
TMEM97
TNFAIP2
TOP1
TP53
TPM1
TPM2
TRIOBP
TRMT1
TTLL12
TUBA3
TXN
UBA52
UBE2D4
UBIAD1
UCP1
UCP3
UROD
UTP14A
UTP14C /// UTP14A
UTP20 /// LOC653877
VAMP1
VAMP2
VHL
WDR12
WDR21A
WDR74
WSB1
WT1
XPO5
YPEL3
ZBED2
ZNF146
ZNF236
ZNF667

## Sheet: Informations
Geneset	Data source	Comparison	Gene number
SOX2 squamous signature	This study	Genes deregulated in BEAS-2B cells SOX2 transduced versus control.	922
Lung SCC signature - 1	Bhattacharjee et al., 2001	Genes deregulated in 21 lung SCC versus 17 normal human lung tissues.	1203
Lung SCC signature - 2	Garber et al., 2001	Genes deregulated in 13 lung SCC versus 5 normal human lung tissues.	975
human ESC-like module	Wong et al., Cell Stem Cell 2008	Genes commonly overexpressed in human ESC and human EC cells.	1247
human ESC consensus module	Assou et al., Stem Cells 2007	Genes consistently overexpressed in human ES cells (vs differentiated cells). Results from the meta-analysis of human ESC profilings (genes overexpressed in at least 5 independent studies out of 20 of hES cells). This geneset was originally defined by Ben-Porath et al.(2008) as the ES EXP 1 geneset.	379
SOX2 targets in human ESCs	Boyer et al., Cell 2005; Assou et al., Stem Cells 2007	Genes bound by SOX2 and activated (n=242) or repressed (n=103) in human ES cells (versus differentiated cells)	345
c-MYC targets	Molecular Signatures Database	Fusion of the lists of genes regulated by c-Myc in 3 independent studies (Fernandez et al., Genes Dev. 2003; Zeller et al., Genome Biol. 2003; Bild et al. Nature 2006. )	415
