# Supplementary material for: SOX2 Is an Oncogene Activated by Recurrent 3q26.3 Amplifications in Human Lung Squamous Cell Carcinomas
Source: PubMed Central journal article supplement (PMC2813300; doi:10.1371/journal.pone.0008960), 2010-01-29

# Hussenet et al., Figure S4

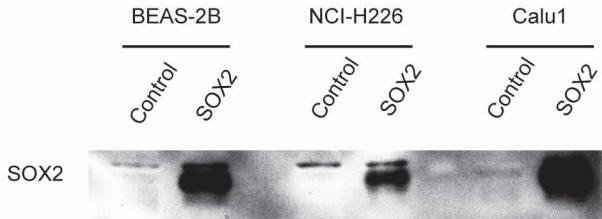

Supplement: pone.0008960.s005.pdf [file pone.0008960.s005.pdf]
