# Supplementary material for: SOX2 Is an Oncogene Activated by Recurrent 3q26.3 Amplifications in Human Lung Squamous Cell Carcinomas
Source: PLoS One. 2010 Jan 29;5(1):e8960. doi: 10.1371/journal.pone.0008960 (PMC2813300; doi:10.1371/journal.pone.0008960)
Supplement: Table S1 — The 50 most over-expressed genes in lung SCC versus normal comparison (dataset 1). Gene Symbol, Gene description, Ratio (log2 value) lung SCC/normal. (0.04 MB XLS) [file pone.0008960.s007.xls]

## Sheet: Feuil1
Rank	Gene Symbol	Gene Title	Log2 Ratio Lung SCC / Normal
1	KRT5	keratin 5	4.471
2	KRT6A	keratin 6A	3.869
3	DSP	desmoplakin	3.674
4	S100A2	S100 calcium binding protein A2	3.651
5	SPP1	secreted phosphoprotein 1	3.2525
6	KRT14	keratin 14 (epidermolysis bullosa simplex, Dowling-Meara, Koebner)	3.087
7	TP63	tumor protein p63	2.632
8	SPRR1B	small proline-rich protein 1B (cornifin)	2.594
9	SERPINB5	serpin peptidase inhibitor, clade B (ovalbumin), member 5	2.5185
10	COL11A1	collagen, type XI, alpha 1	2.508
11	KRT15	keratin 15	2.499
12	TRIM29	tripartite motif-containing 29	2.47
13	NTS	neurotensin	2.377
14	UGT -1A1, -1A10, -1A3 , -UGT1A4, -UGT1A5, -UGT1A6, -UGT1A7, -UGT1A8, -UGT1A9	UDP glucuronosyltransferase 1 family : polypeptides A1, A10, A3, A4, A5, A6, A7, A8, A9	2.327
15	ADH7	alcohol dehydrogenase 7 (class IV), mu or sigma polypeptide	2.285
16	KRT13	keratin 13	2.264
17	GPX2	glutathione peroxidase 2 (gastrointestinal)	2.209
18	LGALS7 /// LGALS7B	lectin, galactoside-binding, soluble, 7 /// lectin, galactoside-binding, soluble, 7B	2.194
19	JUP /// KRT19	junction plakoglobin /// keratin 19	2.138
20	AKR1C1 /// AKR1C2	aldo-keto reductase family 1, member C1 and c2	2.089
21	SOX2	SRY (sex determining region Y)-box 2	2.0515
22	PFN2	profilin 2	2.0375
23	IGFBP2	insulin-like growth factor binding protein 2, 36kDa	2.035
24	AKR1B10	aldo-keto reductase family 1, member B10 (aldose reductase)	2.031
25	CSTA	cystatin A (stefin A)	2.024
26	COL1A2	collagen, type I, alpha 2	1.986
27	HMGA1	high mobility group AT-hook 1	1.985
28	KRT16	keratin 16	1.9795
29	MMP12	matrix metallopeptidase 12 (macrophage elastase)	1.893
30	ZWINT	ZW10 interactor	1.858
31	IGF2BP3	insulin-like growth factor 2 mRNA binding protein 3	1.853
32	RFC4	replication factor C (activator 1) 4, 37kDa	1.843
33	ALDH3A1	aldehyde dehydrogenase 3 family, memberA1	1.822
34	SFN	stratifin	1.785
35	ACTL6A	actin-like 6A	1.773
36	POSTN	periostin, osteoblast specific factor	1.769
37	TFAP2A	transcription factor AP-2 alpha (activating enhancer binding protein 2 alpha)	1.724
38	THBS2	thrombospondin 2	1.719
39	COL3A1	collagen, type III, alpha 1	1.718
40	DSG3	desmoglein 3 (pemphigus vulgaris antigen)	1.712
41	SLC7A5	solute carrier family 7 (cationic amino acid transporter, y+ system), member 5	1.71
42	PAICS	phosphoribosylaminoimidazole carboxylase, phosphoribosylaminoimidazole succinocarboxamide synthetase	1.706
43	SULF1	sulfatase 1	1.684
44	KRT17	keratin 17	1.683
45	ABCC5	ATP-binding cassette, sub-family C (CFTR/MRP), member 5	1.6705
46	MMP9	matrix metallopeptidase 9 (gelatinase B, 92kDa gelatinase, 92kDa type IV collagenase)	1.66
47	SERPINB3	serpin peptidase inhibitor, clade B (ovalbumin), member 3	1.618
48	GCLC	glutamate-cysteine ligase, catalytic subunit	1.607
49	FSCN1	fascin homolog 1, actin-bundling protein (Strongylocentrotus purpuratus)	1.593
50	PCNA	proliferating cell nuclear antigen	1.542
