# Supplementary material for: SOX2 Is an Oncogene Activated by Recurrent 3q26.3 Amplifications in Human Lung Squamous Cell Carcinomas
Source: PLoS One. 2010 Jan 29;5(1):e8960. doi: 10.1371/journal.pone.0008960 (PMC2813300; doi:10.1371/journal.pone.0008960)
Supplement: Table S2 — SOX2 immunostainings individual results for 51 lung SCC. Individual nuclear and cytoplasmic staining scores obtained for the 51 primary tumors. The 5 tumours found with high level amplifications in the initial arrayCGH screen of 26 tumours are indicated in bold. (0.04 MB XLS) [file pone.0008960.s008.xls]

## Sheet: Feuil1
SOX2 IHC stainings scores in 51 lung SCC			NUCLEAR staining			CYTOPLASMIC staining
Sample type	Sample Id	STAGE	% of cells	Intensity	Signal score	% of cells	Intensity	Signal score
Normal	Lung		30	2	60	50	1	50
	Bronchus		30	3	90	100	1	100
LUNG SCC	1 d	III	0	0	0	50	3	150
	2 d	III	90	3	270	0	0	0
	3 d	III	0	0	0	50	2	100
	4 d	III	70	3	210	0	0	0
	5 d	IV	80	3	240	50	2	100
	6 d	III	80	3	240	0	0	0
	7 d	III	90	3	270	0	0	0
	8 d	III	90	3	270	0	0	0
	9 d	III	20	3	60	80	3	240
	10 d	III	60	3	180	0	0	0
	11 d	III	80	3	240	0	0	0
	12 d	III	0	0	0	0	0	0
	13 d	III	90	3	270	0	0	0
	14 d	III	50	3	150	50	2	100
	15 d	III	90	3	270	0	0	0
	16 d	III	0	0	0	50	3	150
	17 d	III	20	2	40	50	1	50
	18 d	III	50	3	150	0	0	0
	19 d	III	20	2	40	20	2	40
	20 d	III	0	0	0	0	0	0
	21 d	III	50	3	150	0	0	0
	22 d	III	80	3	240	0	0	0
	23 d	III	40	3	120	0	0	0
	24 d	III	50	2	100	50	1	50
	25 d	III	0	0	0	0	0	0
	26 d	III	0	0	0	0	0	0
	27 d	III	20	2	40	0	0	0
	28 d	III	0	0	0	0	0	0
	29 d	III	80	3	240	0	0	0
	30 d	III	0	0	0	0	0	0
	31 d	III	50	3	150	0	0	0
	32 d	III	80	3	240	50	2	100
	33d	III	90	3	270	0	0	0
	34 d	III	80	3	240	80	3	240
	35 d	III	90	3	270	0	0	0
	36 d	III	70	3	210	0	0	0
	37 d	III	0	0	0	30	1	30
	38 d	III	0	0	0	80	3	240
	39 d	III	50	3	150	50	2	100
	40 d	III	80	3	240	0	0	0
	41 d	III	80	3	240	0	0	0
	42 d	III	20	2	40	0	0	0
	43 d	III	50	2	100	50	2	100
	44 d	III	60	2	120	30	1	30
	45 d	III	0	0	0	0	0	0
	46d	III	60	2	120	0	0	0
	47 d	III	70	3	210	0	0	0
	48 d	III	60	3	180	20	2	40
	49 d	III	80	3	240	0	0	0
	50 d	III	60	3	180	50	2	100
	51 d	III	30	3	90	50	2	100
