# Supplementary material for: SOX2 Is an Oncogene Activated by Recurrent 3q26.3 Amplifications in Human Lung Squamous Cell Carcinomas
Source: PLoS One. 2010 Jan 29;5(1):e8960. doi: 10.1371/journal.pone.0008960 (PMC2813300; doi:10.1371/journal.pone.0008960)
Supplement: Table S3 — Known SOX2 target genes significantly correlated to SOX2 expression in human lung SCC. Union of the 71 SOX2 activated target genes significantly correlated to SOX2 expression and the 26 SOX2 repressed genes significantly anti-correlated to its expression in lung SCC (97 genes in total). (0.04 MB XLS) [file pone.0008960.s009.xls]

## Sheet: Feuil1
Gene Symbol	Expression correlated or anticorrelated to SOX2 in lung SCC
ALDH7A1	Correlated
ANKRD1	Anti-correlated
APEX1	Correlated
APPBP1	Correlated
ARFGEF1	Correlated
ARHGEF17	Anti-correlated
ATF3	Anti-correlated
BCL9	Correlated
BMP7	Correlated
BMPR2	Anti-correlated
BUB1B	Correlated
BUB3	Correlated
CA4	Anti-correlated
CCL2	Anti-correlated
CDC2	Correlated
CDC45L	Correlated
CDC7	Correlated
CDH2	Correlated
CDH3	Correlated
CDYL	Correlated
CENPE	Correlated
CHEK2	Correlated
COL21A1	Anti-correlated
CPS1	Anti-correlated
CRIM1	Anti-correlated
CTGF	Anti-correlated
CYR61	Anti-correlated
DDX21	Correlated
E2F3	Correlated
EFEMP2	Anti-correlated
EIF2C2	Correlated
EPHA1	Correlated
EPM2AIP1	Anti-correlated
FGF2	Correlated
FRAT2	Correlated
FUS	Correlated
FZD7	Correlated
G3BP	Correlated
GABARAP	Anti-correlated
GAD1	Correlated
GALNT3	Correlated
GCNT2	Correlated
GJA1	Correlated
GNA13	Correlated
H2AFX	Correlated
HDAC2	Correlated
HNRPL	Correlated
HOP	Anti-correlated
IGFBP2	Correlated
ILF3	Correlated
JARID2	Correlated
KDR	Anti-correlated
KIF11	Correlated
KIF23	Correlated
KIF2C	Correlated
KNTC1	Correlated
LRP2	Anti-correlated
MEIS1	Anti-correlated
MGC14376	Anti-correlated
NEDD9	Anti-correlated
NFE2L3	Correlated
NUP160	Correlated
OIP5	Correlated
ORC1L	Correlated
PAK1	Correlated
PCDH17	Anti-correlated
PIR	Correlated
PMAIP1	Correlated
POU2F1	Correlated
PPAT	Correlated
PRDX1	Correlated
PWP1	Correlated
RIF1	Correlated
RPL7	Correlated
RPLP1	Correlated
RPS18	Correlated
RRAS	Anti-correlated
RRS1	Correlated
SC5DL	Correlated
SERPINA1	Anti-correlated
SET	Correlated
SKIL	Correlated
SLC3A2	Correlated
SLC7A7	Anti-correlated
SMARCA3	Correlated
SNRPA	Correlated
SNRPD3	Correlated
TALDO1	Correlated
TFAP2C	Correlated
THBS3	Anti-correlated
TIA1	Correlated
TOP2A	Correlated
TPM3	Correlated
TTF2	Correlated
TUBB	Correlated
UBE2C	Correlated
VIM	Anti-correlated
